# Supplementary material for: A technology-based global non-methane volatile organic compounds (NMVOC) emission inventory under the MEIC framework
Source: Copernicus journal article supplement (doi:10.5194/egusphere-2025-1085), 2025-05-08
Supplement: Supplementary file 1 [file egusphere-2025-1085-supplement.pdf]

*Supplementary Information of*

**A technology-based global non-methane volatile organic compounds  
(NMVOC) emission inventory under the MEIC framework**

Ruochong Xu<sup>1</sup>, Hanchen Ma<sup>1</sup>, Jingxian Li<sup>2</sup>, Dan Tong<sup>1</sup>, Liu Yan<sup>2</sup>, Lanyuan Wang<sup>2</sup>, Xinying Qin<sup>1</sup>, Qingyang Xiao<sup>2</sup>, Xizhe Yan<sup>1</sup>, Hanwen Hu<sup>2</sup>, Yujia Fu<sup>2</sup>, Nana Wu<sup>1</sup>, Huaxuan Wang<sup>2</sup>, Yuexuanzi Wang<sup>1</sup>, Xiaodong Liu<sup>2</sup>, Guannan Geng<sup>2</sup>, Kebin He<sup>2,3</sup>, and Qiang Zhang<sup>1,\*</sup>

<sup>1</sup>Department of Earth System Science, Ministry of Education Key Laboratory for Earth System Modeling, Institute for Global Change Studies, Tsinghua University, Beijing 100084, People's Republic of China

<sup>2</sup>State Key Joint Laboratory of Environment Simulation and Pollution Control, School of Environment, Tsinghua University, Beijing 100084, People's Republic of China

<sup>3</sup>Institute for Carbon Neutrality, Tsinghua University, Beijing 100084, People's Republic of China

*Correspondence to:* Qiang Zhang (qiangzhang@tsinghua.edu.cn)

## Supplementary Text S1. Calculation of emission factors.

### S1.1. Road transport

The fleet-based model for on-road transport provides NMVOC emission factors under three emission modes: running, evaporation, and start as illustrated below.

#### Running emissions

As the cumulative mileage increases, the running emission factor increases in comparison to the emission factor of a new vehicle, due to wear and tear, component failure, and poor maintenance etc. Therefore, the “deterioration factor” was introduced to represent the impacts of vehicle aging on running emission factor. For running emissions, annual average emission factors at country level was calculated as follows:

$$EF_{c,y,v,f,s,p,running} = BEF_{c,v,f,s,p} \times D_{v,f,s,y,p} \quad (S1.1)$$

where  $c$ ,  $y$ ,  $v$ ,  $f$ ,  $s$ , and  $p$  represent country, year, vehicle category, fuel type, emission standard, and species (i.e., NMVOC here), respectively;  $BEF$  represent the baseline emission factor based on fuel consumption;  $D$  represents the vehicle deterioration factor. The larger the cumulative mileage of the fleet in the year  $y$ , the larger the deterioration factor.

To estimate the deterioration factor, we referred to the approach in the International Vehicle Emission (IVE) model (Davis et al., 2005), and divided the cumulative mileage of passenger cars and trucks into three stages: less than 80,000 kilometers, greater than 160,000 kilometers, and between 80,000 and 160,000 kilometers. We first calculated the cumulative mileage of vehicles with different ages year by year, determined their deterioration factors based on the mileage division, and finally estimated the emission-standard-specific deterioration factors in each year, incorporating age distribution and emission standard implementation.

As previous studies have shown that the baseline emission factors that correspond to the same emission standard are somewhat different across countries and regions, the application of emission factors from local field measurements is important for accurately estimating running emissions. In this study, global default emission factors for each emission standard were obtained from the EMEP Guidebook (EEA, 2019; 2023). We then extensively reviewed the literatures on emission factor measurements and estimates of on-road transport emissions, and used local emission factors to replace the global default values in large economies (e.g., Zheng et al., 2014), improving the accuracy of emission estimates at regional and country level.

#### Evaporation emissions

For gasoline-fueled vehicles, the fuels in the vehicle engine and tank evaporate and dissipate into the atmosphere. This emission process is affected by ambient temperature. We relied on the Tier 1 approach recommended in the EMEP Guidebook to obtain global default values, as shown in equation S1.2 (EEA, 2019), and further integrated local emission factors at regional or country level (e.g., Zheng et al., 2014).

$$EF_{c,y,v,f,evap} = Stock_{c,y,f,v} \times \sum_{m=1}^{m=12} EF_{evap,y,m,v,f,temp} \times Day_{y,m} / Fuel_{c,y,v,f} \quad (S1.2)$$

where  $m$  represents month;  $Stock$ ,  $Day$ , and  $Fuel$  represent vehicle ownership, number of the days in month  $m$  of year  $y$ , and fuel consumption, respectively;  $temp$  represents temperature

interval. Following the division in the EMEP Guidebook, the monthly average temperature was divided into four temperature intervals:  $< 0^{\circ}\text{C}$ ,  $0\text{-}10^{\circ}\text{C}$ ,  $10\text{-}20^{\circ}\text{C}$ , and  $> 20^{\circ}\text{C}$  (EEA, 2019).  $EF_{evap}$  represents the daily NMVOC emissions per vehicle in different temperature intervals. Fuel consumption in each month was assumed to be equal within a year. The monthly average temperature in each country was calculated from the ERA5  $0.25^{\circ}\times 0.25^{\circ}$  reanalysis data (Hersbach et al., 2020).

### Start emissions

During the start process, incomplete fuel combustion produces NMVOC emissions (called start emissions here). Start emissions are also affected by ambient environment. When ambient temperature is low, the time required for the catalyst to reach the operating temperature becomes longer, and thus start-mode emission factors increase. We relied on the Tier 2 approach recommended in the EMEP Guidebook to obtain global default values, as shown in equation S1.3 (EEA, 2019), and further integrated local emission factors at regional or country level (e.g., Zheng et al., 2014).

$$EF_{c,y,v,f,s,p,cold} = EF_{rnnng_{c,y,v,f,s,p}} \times \alpha_{v,f,s,p,m} \times \beta_{v,f,s,p,m} \quad (S1.3)$$

where  $EF_{rnnng}$  represents running emission factor in equation S1.1;  $\alpha$  represents the cold start factor that is a function of temperatures, and  $\beta$  is a factor related to temperatures and vehicle types. The values of  $\alpha$  and  $\beta$  were obtained from the EMEP Guidebook (EEA, 2019).

### S1.2. Off-road transport

For off-road vehicles used in agriculture, forestry, and fishing, emission-standard-specific emission factors were obtained from the MOtor Vehicle Emission Simulator (MOVES) for North America and the EMEP Guidebook for other regions with emission standards (US EPA, 2021; EEA, 2023; the emission standards in each country were mapped to the EU standards according to emission limits). For countries without emission standards, EU pre-1981 emission factors were used.

The NMVOC emissions from international and domestic aviation were estimated by flight based the detailed flight information provided by OAG, including flight time, flight route, and aircraft type (OAG). The flight process was divided into landing and take-off (LTO) and cruise phases. The aircraft-type- and engine-type-specific emission factors (i.e., the NMVOC emissions per unit LTO time and per unit cruise distance) were obtained from the EMEP database (EEA, 2023). For the aircraft and engine types that were not included in the EMEP database, we used the average emission factors of aircrafts with similar seat number and aircraft size. For navigation emissions, we referred to previous studies that estimated emissions based on navigation routes and vessel types (Wang et al., 2021; Liu et al., 2016; Luo et al., 2024).

### S1.3. Industrial process

#### Tyre production

For tyre production, since the unit of activity rates is thousand units and the unit of unabated emission factors in the EMEP Guidebook is g/kg tyres (EEA, 2023), the weight of tyres needs to be known to transfer the emission factor unit to kg/unit. The weight of tyres depends on vehicle category, and thus the average weight of tyres produced in a country were assumed to be determined by the vehicle-category-specific fleet structure. Here, it was assumed that the weight of tyres of different vehicle categories was between 8.6 kg to 49.9 kg based on literatures and market surveys.

Then we estimated the average weight of tyres produced in each country, using the assumed weight and the ownership of different vehicle categories in the fleet-based model (Yan et al., 2024; Zheng et al., 2014). The unabated emission factors in kg/unit were then calculated by multiplying the average weight and the default unabated emission factor in the EMEP Guidebook (EEA, 2023). This resulted in unabated emission factors ranging from 0.09 kg/unit to 0.46 kg/unit in 1970 and from 0.09 kg/unit to 0.25 kg/unit in 2020.

#### ***S1.4. Solvent use***

##### **Vehicle resealing**

The unabated emission factor of vehicle resealing was provided in unit of kg/capita, heavily depending on income level and economic development level (e.g., 0.01-0.2 kg/capita; EEA, 2023). Here, we used a power function to fit the lower and upper values in the EMEP Guidebook, representing the increase in unabated emission factor as GDP per capita increases as below:

$$EF_{vehicle\ resealing} = 0.0016 \times (GDP\ per\ capita)^{0.4016} \quad (S1.4)$$

##### **Dry cleaning**

The unabated emission factor of dry cleaning was also provided in unit of kg/capita (e.g., 0.2-0.6 kg/capita; US EPA, 1995), which is tightly related to the access of residents to dry cleaning machines. Here, it was assumed that 0.6 kg/capita and 0.2 kg/capita represented the emission level of urban and rural population, respectively. The emission unabated factors in each country were calculated as below:

$$EF_{dry\ cleaning} = 0.6 \times urbanization\ rate + 0.2 \times (1 - urbanization\ rate) \quad (S1.5)$$

##### **Domestic solvent use**

The emissions from domestic solvent use were estimated by a population-based method (EEA, 2023). We first collected emission factors (emissions per capita) from literatures (Pearson, 2019; Zhang et al., 2009; Klimont et al., 2002; French National Emission Inventory Agency, 2021; Brussels Instituut voor Milieubeheer, 2010; Rijksinstituut voor Volksgezondheid en Milieu, 2022), which ranged from 0.1 kg/capita to 2.4 kg/capita. Several parameters, including GDP per capita, urbanization rate, latitude, and temperature were used to check if they had good correlation with the collected emission factors, and finally GDP per capita and annual average temperature were selected as independent variables in the fitting model. A power function was used to fit the model as shown below:

$$EF_{domestic\ solvent\ use} = 0.08 \times GDP^{0.39} \times Temp^{3.62} \quad (R = 0.72, RMSE = -0.01) \quad (S1.6)$$

It represents the increase in emission factors driven by economic growth, which boosts personal VCPs consumption, and rising temperatures, which enhance evaporation.

### **Supplementary Text S2.** Technology turnover model for residential stoves.

Here, we distinguished traditional and advanced stoves for residential coal and biomass combustion. First, we collected data on the proportions of traditional and advanced stoves from literatures, and obtained 86 data points in 29 countries that accounted for approximately 74% of global residential energy consumption in 2020.

Next, we investigated the relationships between the collected data and socioeconomic parameters. It was shown that country-level GDP per capita and urbanization rate both had good correlation with the collected data ( $R^2 = \sim 0.80$ ): the higher the GDP per capita and urbanization rates, the higher the proportions of advanced stoves. Therefore, GDP per capita and urbanization rate were selected as independent variables in the fitting model.

We then tested different functional forms for the fitting model, including linear function, combined linear and quadratic function, combined linear and square root function, and combined linear and indeterminate power function. We selected the one with highest  $R^2$  and smallest RMSE. The final fitting model is shown as below:

$$\begin{aligned} f(\text{GDP per capita}, \text{urbanization rate}) \\ = 6.719 \times \text{GDP per capita}^{0.241} + 0.3325 \times \text{urbanization rate} \\ - 29.06 \quad (S2.1) \end{aligned}$$

The model was then validated by a 10-fold cross-validation approach. 90% of the original collected data points were randomly selected to fit the model, and the remaining 10% of data points were used for validation. The results showed that the fitting model was reliable ( $R^2 = 0.85$ , RMSE = 5.14).

The model was finally used to estimate the full time series of stove type evolution for all countries. To separate the technology distributions for rural and urban areas, it was assumed that the proportions of advanced stoves were 0% for rural residential combustion, and then the proportions of advanced stoves for urban residential combustion could be calculated. The model represented the increased proportions of advanced stove as economy and urbanization develop, with constraint from collected data.

**Supplementary Text S3. Driving factor decomposition.**

To illustrate the effects of different emission parameters on global and regional emission changes, we performed a driving factor decomposition analysis in this study. Three factors were considered, i.e., activity rate, technology distribution and unabated emission factor, and emission control. Following our previous studies (Liu et al., 2015; Liu et al., 2021), for a given period, we developed three hypothetical scenarios to estimate the contributions from each factor incrementally. For example, for the period of 1970-1990, we built the baseline scenario by changing the activity rate from the amount in 1990 to the amount in 1970, and then changed the other two factors incrementally to the levels in 1970. The differences between every consecutive step was an estimate of the contributions from each factor.

#### Supplementary Text S4. Uncertainty analysis.

Emission estimates are subject to uncertainty because of incomplete information of activity rates, emission factors, and other parameters (Gurney et al., 2016). In order to more completely assess the uncertainties of our NMVOC emission estimates, uncertainty analysis was performed at country level by source category, following the methodology demonstrated by previous studies (Zhao et al., 2011; Tong et al., 2018; Chen et al., 2022). The term “uncertainty” here refers to the lower and upper bounds of the 95% confidential interval (CI) around the central estimate. Input parameters of activity rates, technology distributions, unabated emission factors, and penetration ratios of control technologies, as well as corresponding statistical distributions (see Table S11), were placed in a Monte Carlo framework, and 1,000 simulations were performed to analyze the uncertainties of NMVOC emissions.

For activity rates, normal distribution was used for simulation; for other parameters, lognormal and uniform distribution were mainly used for simulation. If negative numbers were generated, the value was set to 0. It should be noted that for activity rates and unabated emission factors, the simulations were independent among the source categories, but for technology distributions and penetration ratios of control technologies, the simulations were not independent when two or more technologies were applied, because they represented the “proportions” of technologies applied that should always summed up to 100%. In this case, the simulations of a group of correlated technologies were performed as below, using a modified approach based on previous work (Lu et al., 2011).

In a simulation with  $n$  technologies (of which proportions were  $X_1, X_2, \dots, X_n$ ), we first randomly selected a technology (i.e., randomly selected  $i$  from 1, 2, ...,  $n$ , and obtained technology  $i$  with  $X_i$ ), and uniform distribution was used to calculate the proportion in random sampling (so called  $X'_i$ ); then the sum of proportions of remaining  $n - 1$  technologies were normalized to  $(100 - X'_i)$ . Next, another technology was randomly selected from the remaining technologies (i.e., randomly selected  $j$  from 1, 2, ...,  $n$ , excluding  $i$ , and obtained technology  $j$  with  $X_j$ ), and random sampling was performed for  $X_j$  to obtain  $X'_j$ ; the sum of proportions of remaining  $n - 2$  technologies were again normalized to  $(100 - X'_i - X'_j)$ ... The sampling was performed iteratively until there was only one technology left and a simulation was finished. By performing 1,000 simulations, we can quantify the uncertainties of technology distributions or penetration ratios of control technologies with the constraint that proportions summed up to 100% in each step.

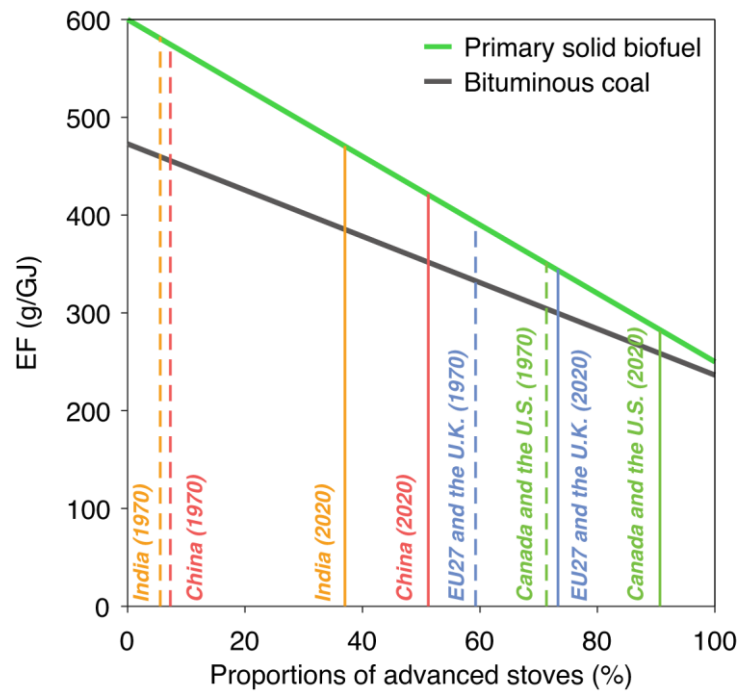

**Figure S1.** Decreases of unabated emission factors for residential biomass and coal combustion as proportions of advanced stoves increase. The dashed and solid lines represent the regional proportions of advanced stoves and corresponding unabated emission factors in 1970 and 2020, respectively.



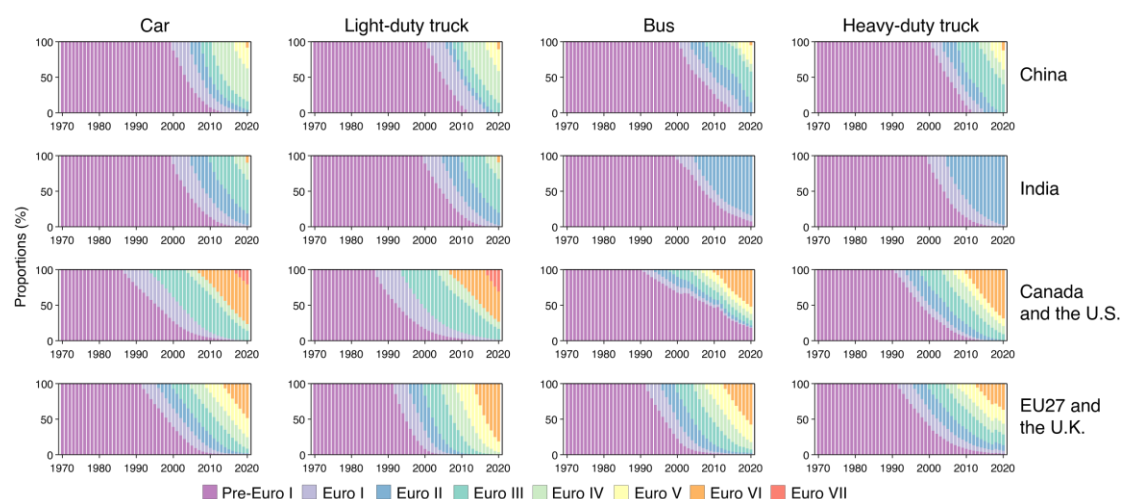

**Figure S2.** Proportions of emission-standard-specific cars, light-duty trucks, buses, and heavy-duty trucks in China, India, Canada and the U.S., and EU27 and the U.K. from 1970 to 2020.

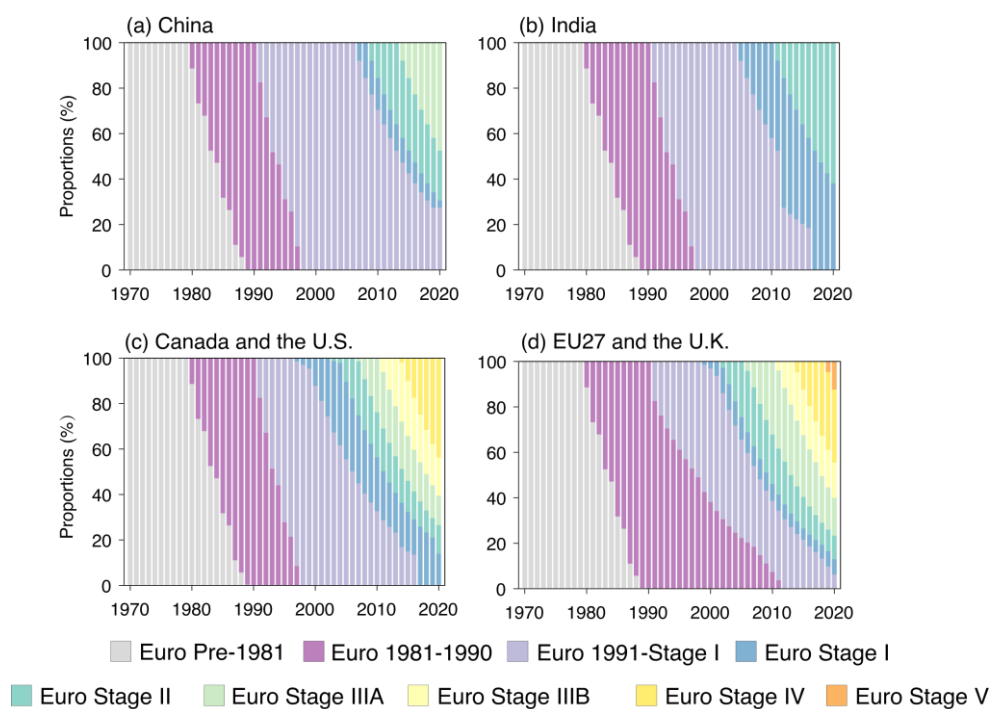

**Figure S3.** Proportions of emission-standard-specific off-road vehicles in China, India, Canada and the U.S., and EU27 and the U.K. from 1970 to 2020.

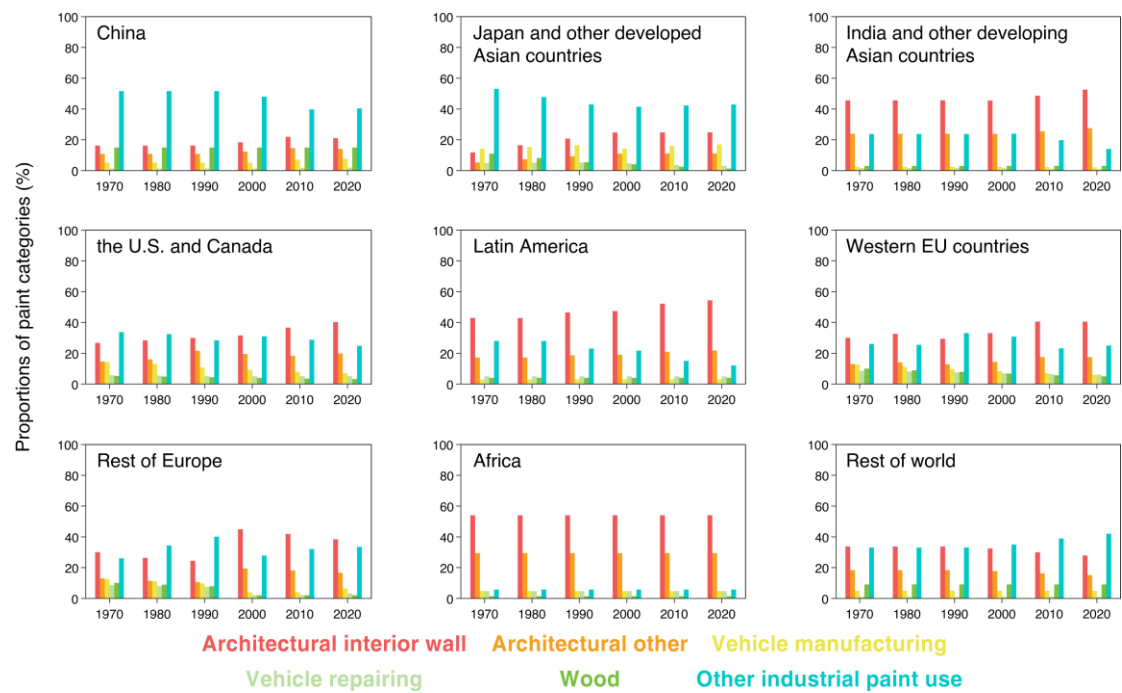

**Figure S4.** Proportions of six application purposes for paint consumption in the selected regions in 1970, 1980, 1990, 2000, 2010, and 2020.

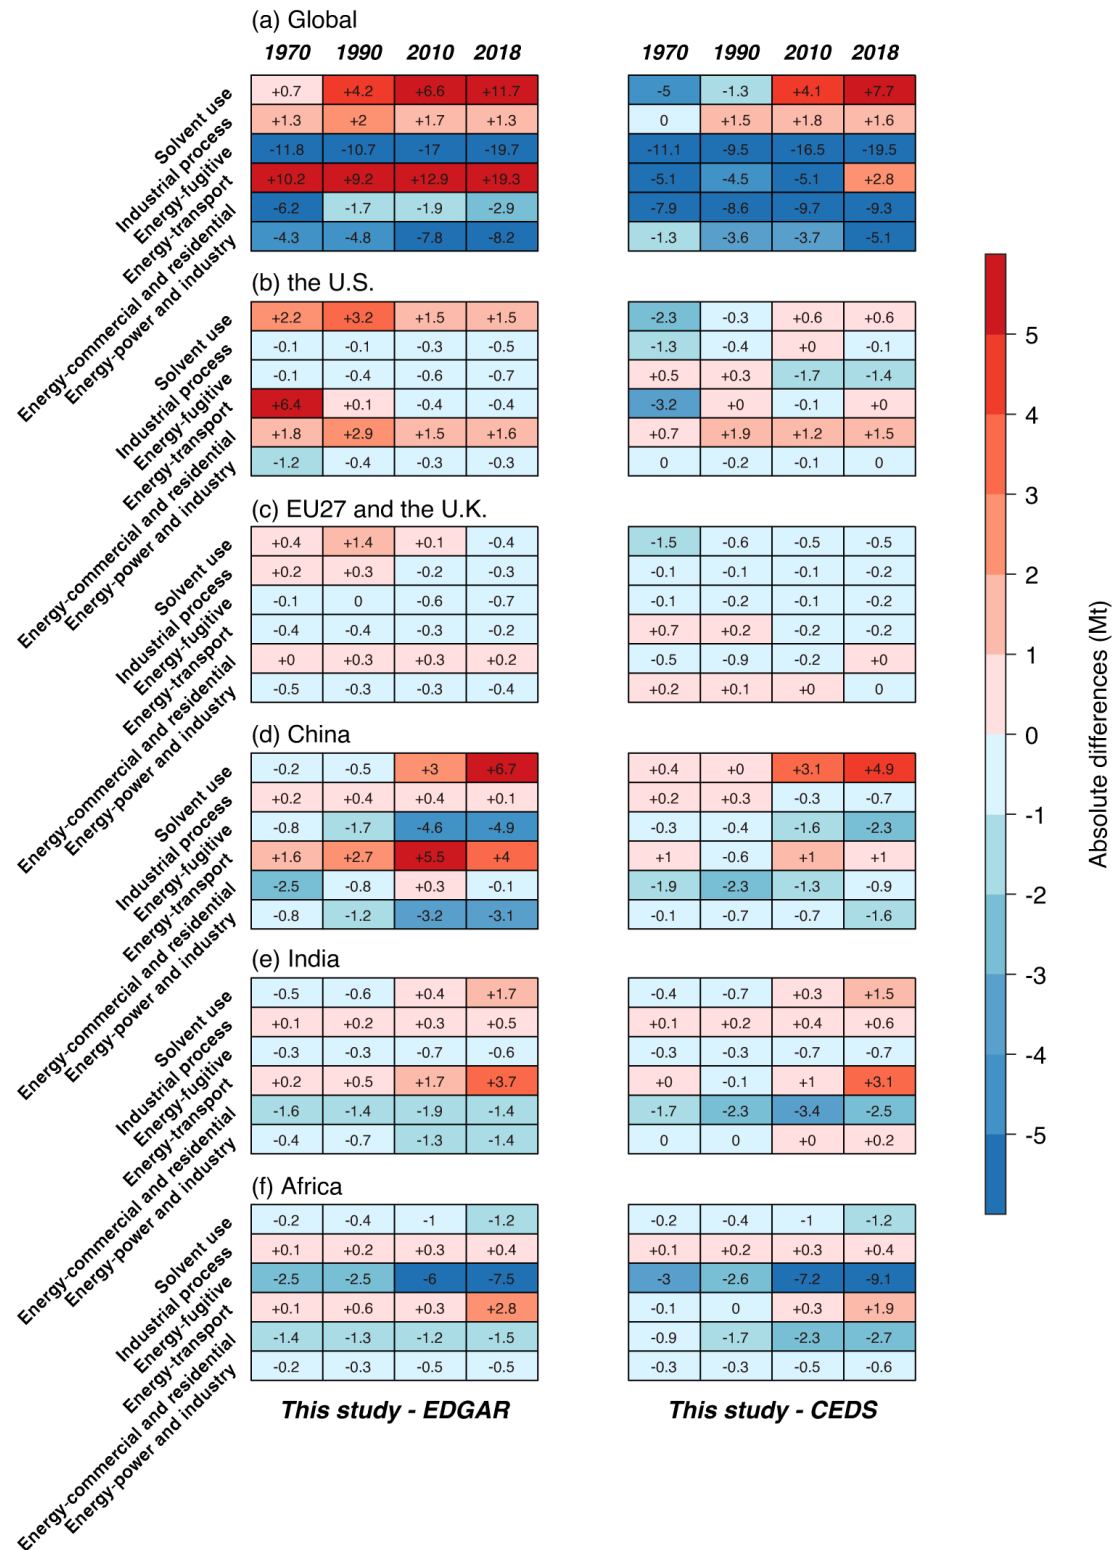

Figure S5. The same as Figure 11 but for absolute differences.

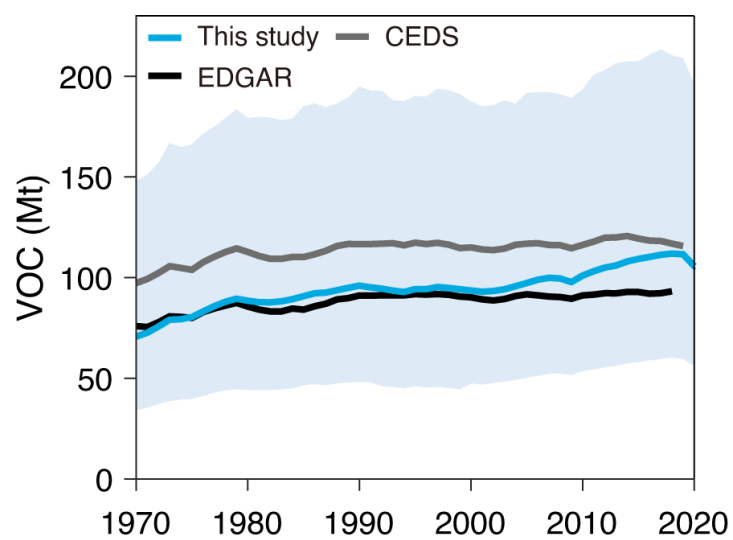

**Figure S6.** The same as Figure 10a but excluding all fugitive emissions from solid fuel production.

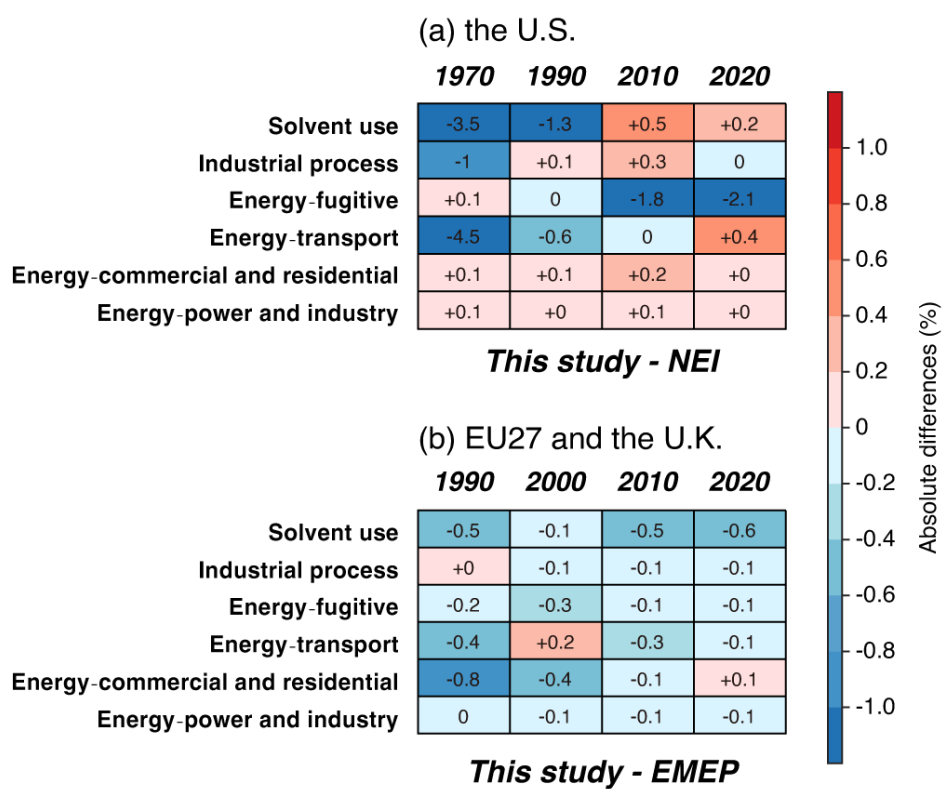

Figure S7. The same as Figure 12 but for absolute differences.

**Table S1.** The source categories, their IPCC GL code categories, and mapping to the major and detailed sources in the analysis.

| 1 <sup>st</sup> level<br>(Major sectors) | 2 <sup>nd</sup> level                       | 3 <sup>rd</sup> level                                                                      | 4 <sup>th</sup> level | 5 <sup>th</sup> level | IPCC GL code category | Mapping to detailed sources                                                       |
|------------------------------------------|---------------------------------------------|--------------------------------------------------------------------------------------------|-----------------------|-----------------------|-----------------------|-----------------------------------------------------------------------------------|
| Energy-power and industry                | Power generation                            | Coal                                                                                       |                       |                       | 1A1a                  | Distinguished by fuel type (Coal, Oil, Gas, and Biomass in 2 <sup>nd</sup> level) |
|                                          | Heat (auto producer)                        | (Anthracite, Coking coal, Other                                                            |                       |                       |                       |                                                                                   |
|                                          | Heat (public)                               | bituminous coal,                                                                           |                       |                       |                       |                                                                                   |
|                                          | Coal mines                                  | Sub-bituminous coal,                                                                       |                       |                       |                       |                                                                                   |
|                                          | Oil and gas extraction                      | Lignite, Patent fuel,                                                                      |                       |                       |                       |                                                                                   |
|                                          | Blast furnaces                              | Coke oven coke, Gas                                                                        |                       |                       |                       |                                                                                   |
|                                          | Gas works                                   | coke, Coal tar, BKB,                                                                       |                       |                       |                       |                                                                                   |
|                                          | Gasification                                | Gas works gas, Coke                                                                        |                       |                       |                       |                                                                                   |
|                                          | plants for biogases                         | oven gas, Blast                                                                            |                       |                       |                       |                                                                                   |
|                                          | Coke ovens                                  | furnace gas, Other                                                                         |                       |                       |                       |                                                                                   |
|                                          | Patent fuel plants                          | recovered gases,                                                                           |                       |                       |                       |                                                                                   |
|                                          | BKB/peat                                    | Peat, Peat products)                                                                       |                       |                       |                       |                                                                                   |
|                                          | briquette plants                            |                                                                                            |                       |                       |                       |                                                                                   |
|                                          | Oil refineries                              | Oil                                                                                        |                       |                       |                       |                                                                                   |
|                                          | Coal liquefaction                           | (Crude oil, Natural                                                                        |                       |                       |                       |                                                                                   |
|                                          | plants                                      | gas liquids, Refinery                                                                      |                       |                       |                       |                                                                                   |
|                                          | Liquefaction (LNG) /                        | feedstocks,                                                                                | None                  | None                  | 1A1b and              |                                                                                   |
|                                          | regasification                              | Additives/blending                                                                         |                       |                       | 1A1c                  |                                                                                   |
|                                          | plants                                      | components, Other                                                                          |                       |                       |                       |                                                                                   |
|                                          | Gas-to-liquids (GTL) plants                 | hydrocarbons,                                                                              |                       |                       |                       |                                                                                   |
|                                          | Own use in electricity, CHP and heat plants | Refinery gas, Ethane,                                                                      |                       |                       |                       |                                                                                   |
|                                          | Charcoal production plants                  | Liquefied petroleum                                                                        |                       |                       |                       |                                                                                   |
|                                          | Non-specified transformation industries     | gases (LPG), Motor gasoline excluding biofuels, Aviation gasoline, Gasoline type jet fuel, |                       |                       |                       |                                                                                   |
|                                          | Iron and steel                              | Kerosene type jet fuel excluding biofuels, Other                                           |                       |                       |                       |                                                                                   |
|                                          | Non-ferrous metals                          | kerosene, Gas/diesel oil excluding                                                         |                       |                       |                       |                                                                                   |
|                                          | Chemicals                                   | biofuels, Fuel oil,                                                                        |                       |                       |                       |                                                                                   |
|                                          | Pulp and paper                              | Naphtha, White spirit and SBP, Lubricants,                                                 |                       |                       |                       |                                                                                   |
|                                          | Bitumen, Paraffin                           |                                                                                            |                       |                       |                       |                                                                                   |
|                                          | waxes, Petroleum                            |                                                                                            |                       |                       |                       |                                                                                   |

|                                   |                                |                                                                            |                                                                          |                             |                                                                  |
|-----------------------------------|--------------------------------|----------------------------------------------------------------------------|--------------------------------------------------------------------------|-----------------------------|------------------------------------------------------------------|
|                                   | Food and tobacco               | coke, Other oil                                                            |                                                                          | 1A2e                        |                                                                  |
|                                   | Cement                         | products, Oil shale                                                        |                                                                          | 1A2f                        |                                                                  |
|                                   | Other non-metallic minerals    | and oil sands)                                                             |                                                                          | 1A2f                        |                                                                  |
|                                   | Transport equipment            | Natural gas (Natural gas)                                                  |                                                                          | 1A2g                        |                                                                  |
|                                   | Machinery                      |                                                                            |                                                                          | 1A2h                        |                                                                  |
|                                   | Mining and quarrying           | Biomass (Renewable                                                         |                                                                          | 1A2i                        |                                                                  |
|                                   | Wood products                  | municipal waste,                                                           |                                                                          | 1A2j                        |                                                                  |
|                                   | Construction                   | Primary solid                                                              |                                                                          | 1A2k                        |                                                                  |
|                                   | Textile and leather            | biofuels, Biogases, Bio gasoline,                                          |                                                                          | 1A2l                        |                                                                  |
|                                   | Other non-specified industries | Biodiesels, Bio jet kerosene, Other liquid biofuels, Non-specified primary |                                                                          | 1A2m                        |                                                                  |
| Energy-transport                  | International aviation         | biofuels/waste, Charcoal)                                                  | LTO and cruise                                                           | 1A3a                        |                                                                  |
|                                   | Domestic aviation              |                                                                            |                                                                          |                             |                                                                  |
|                                   | Rail                           |                                                                            |                                                                          | 1A3c                        |                                                                  |
|                                   | International navigation       |                                                                            |                                                                          |                             |                                                                  |
|                                   | Domestic navigation            |                                                                            | None                                                                     | 1A3d                        | Other transport                                                  |
|                                   | Pipeline transport             |                                                                            |                                                                          |                             |                                                                  |
|                                   | Other non-specified transport  |                                                                            |                                                                          | 1A3e                        |                                                                  |
|                                   | Agriculture and forestry       |                                                                            | Emission standards                                                       | Implied in emission factors | 1A4c Off road AFF                                                |
|                                   | Fishing                        |                                                                            |                                                                          |                             |                                                                  |
|                                   | Cars                           |                                                                            | Running, start, evaporation                                              |                             | Cars                                                             |
|                                   | Light duty trucks              |                                                                            | (Stage 0, Stage 1, Stage 2, Stage 3, Stage 4, Stage 5, Stage 6, Stage 7) | Implied in emission factors | Light duty trucks                                                |
|                                   | Buses                          |                                                                            |                                                                          | 1A3b                        | Buses                                                            |
|                                   | Heavy duty trucks              |                                                                            |                                                                          |                             | Heavy duty trucks                                                |
|                                   | Motorcycles                    |                                                                            |                                                                          |                             | Motorcycles                                                      |
| Energy-commercial and residential | Other fleet totals             |                                                                            |                                                                          |                             | Other transport                                                  |
|                                   | Commercial and institutional   |                                                                            | Traditional stoves                                                       | 1A4a                        | Distinguished by                                                 |
|                                   | Residential (rural)            |                                                                            | and advanced stoves                                                      | None                        | fuel type (Coal, Oil, Gas, and Biomass in 2 <sup>nd</sup> level) |
|                                   | Residential (urban)            |                                                                            |                                                                          | 1A4b                        |                                                                  |
|                                   | Non-specified                  |                                                                            | None                                                                     | None                        | 1A5                                                              |



| sectors            |                                  |                                                               |      |           |      |                                                               |
|--------------------|----------------------------------|---------------------------------------------------------------|------|-----------|------|---------------------------------------------------------------|
| Energy-fugitive    | Fugitive (solid fuel production) | Coke oven coke production                                     | None | None      | 1B1c | Solid fuel production                                         |
|                    | Fugitive (oil and gas)           | Oil production                                                | None | Abatement | 1B2a | Oil production, storage, transport, and refining              |
|                    |                                  | Oil storage and transport                                     |      |           |      |                                                               |
|                    |                                  | Oil refining                                                  |      |           |      |                                                               |
|                    |                                  | Gasoline storage                                              |      |           |      | Gasoline/Diesel storage and distribution                      |
|                    |                                  | Gasoline distribution                                         |      |           |      |                                                               |
|                    |                                  | Diesel storage                                                |      |           | 1B2b | Venting and flaring                                           |
|                    |                                  | Venting and flaring                                           |      |           |      |                                                               |
|                    |                                  | Flaring in oil refinery                                       |      |           |      | Natural gas production, processing, storage, and distribution |
|                    |                                  | Natural gas production, processing, storage, and distribution |      |           |      |                                                               |
|                    |                                  | Gas venting and flaring                                       |      |           |      |                                                               |
| Industrial process | Mineral industry                 | Cement production                                             | None | None      | 2A1  | Other industries                                              |
|                    |                                  | Clicker production                                            |      |           | 2A1  |                                                               |
|                    |                                  | Glass production                                              |      |           | 2A3  |                                                               |
|                    | Chemical industry (inorganic)    | Ammonia                                                       | None | Abatement | 2B1  | Chemical industry (inorganic)                                 |
|                    |                                  | Carbon black                                                  |      |           | 2B8  |                                                               |
|                    |                                  | Adipic acid                                                   |      |           | 2B3  |                                                               |
|                    |                                  | Ethylene                                                      |      |           | 2B8  |                                                               |
|                    |                                  | Vinyl chloride                                                |      |           | 2B8  |                                                               |
|                    |                                  | Styrene                                                       |      |           | 2B11 |                                                               |
|                    |                                  | Low density polyethylene (LDPE)                               |      |           | 2B11 |                                                               |
|                    |                                  | High density polyethylene (HDPE)                              |      |           | 2B11 |                                                               |
|                    | Chemical industry (organic)      | Polyvinyl chloride (PVC)                                      |      |           | 2B11 | Chemical industry (organic)                                   |
|                    |                                  | Polypropylene (PP)                                            |      |           | 2B11 |                                                               |
|                    |                                  | Polystyrene (PS)                                              |      |           | 2B11 |                                                               |
|                    |                                  | SAN & ABS resins                                              |      |           | 2B11 |                                                               |
|                    |                                  | Other synthetic resins                                        |      |           | 2B11 |                                                               |
|                    |                                  | Ethylene oxide                                                |      |           | 2B8  |                                                               |
|                    |                                  | Methanol                                                      |      |           | 2B8  |                                                               |
|                    |                                  | Acrylonitrile                                                 |      |           | 2B8  |                                                               |
|                    |                                  | Glyoxylic acid                                                |      |           | 2B4  |                                                               |

|                                      |                                |                                           |           |     |                                      |
|--------------------------------------|--------------------------------|-------------------------------------------|-----------|-----|--------------------------------------|
| Chemical industry<br>(manufacturing) | Synthetic rubber               | None                                      | Abatement | 2D3 | Chemical industry<br>(manufacturing) |
|                                      | Tyre production                |                                           |           |     |                                      |
|                                      | Pharmaceutical<br>production   |                                           |           |     |                                      |
|                                      | Asphalt                        |                                           |           |     |                                      |
|                                      | Paint production               |                                           |           |     |                                      |
|                                      | Printing ink<br>production     |                                           |           |     |                                      |
|                                      | Glues production               |                                           |           |     |                                      |
|                                      | Shoes production               |                                           |           |     |                                      |
|                                      | Leather tanning                |                                           |           |     |                                      |
|                                      | Synthetic fibre                |                                           |           |     |                                      |
|                                      | Wool                           |                                           |           |     |                                      |
|                                      | Silk                           |                                           |           |     |                                      |
|                                      | Cloth                          |                                           |           |     |                                      |
|                                      | Artificial fibre               |                                           |           |     |                                      |
|                                      | Metal industry                 |                                           |           |     |                                      |
| Pellet production                    |                                |                                           |           |     |                                      |
| Pig iron production                  |                                |                                           |           |     |                                      |
| DRI production                       |                                |                                           |           |     |                                      |
| Steel production                     |                                |                                           |           |     |                                      |
| EAF/BOF/OHF                          |                                |                                           |           |     |                                      |
| Pulp, paper, and<br>food industry    | Paper pulp                     | None                                      | Abatement | 2H1 | Paper and pulp<br>industry           |
|                                      | Paper                          |                                           |           |     |                                      |
|                                      | Plywood                        |                                           |           |     |                                      |
|                                      | Bread                          |                                           |           | 2H2 |                                      |
|                                      | Biscuit                        |                                           |           |     |                                      |
|                                      | Sugar                          |                                           |           |     |                                      |
|                                      | Flour                          |                                           |           |     |                                      |
|                                      | Oilseed                        |                                           |           |     |                                      |
|                                      | Beer                           |                                           |           | 2D  | Food industry                        |
|                                      | Wine                           |                                           |           |     |                                      |
|                                      | Spirit                         |                                           |           |     |                                      |
| Paint use                            | Architectural interior<br>wall | Waterborne and<br>solvent-based<br>paints | Abatement | 2D3 | Architecture paint                   |
|                                      | Architecture other             |                                           |           |     |                                      |
|                                      | Vehicle<br>manufacturing       |                                           |           |     | Vehicle paint                        |
|                                      | Vehicle repairing              |                                           |           |     |                                      |
|                                      | Wood                           |                                           |           |     | Other industry<br>paint              |
|                                      | Other industrial paint         |                                           |           |     |                                      |
|                                      | Other industrial<br>use        |                                           |           |     | Vehicle dewax                        |
| Vehicle reseal                       |                                |                                           |           |     |                                      |
| Printing ink use                     |                                | Printing                                  |           |     |                                      |

|              |                      |      |           |  |                   |
|--------------|----------------------|------|-----------|--|-------------------|
|              | Glues and adhesives  |      |           |  |                   |
|              | use                  |      |           |  | Other solvent use |
|              | Preservation of wood |      |           |  |                   |
|              | Degreasing           |      |           |  |                   |
|              | Dry cleaning         |      |           |  | Dry cleaning      |
|              |                      |      |           |  | Domestic solvent  |
| Domestic use | Domestic use         | None | Abatement |  | use               |
|              | Pesticide            |      |           |  | Other solvent use |

**Table S2.** The countries/territories, their ISO-3166 codes, and mapping to the regions in the analysis.

| Country/territory                | ISO-3166 code | Region              |
|----------------------------------|---------------|---------------------|
| Afghanistan                      | AFG           | Rest of Asia        |
| Albania                          | ALB           | Rest of Europe      |
| Algeria                          | DZA           | Rest of world       |
| American Samoa                   | ASM           | Rest of world       |
| Angola                           | AGO           | Rest of world       |
| Anguilla                         | AIA           | Latin America       |
| Antigua and Barbuda              | ATG           | Latin America       |
| Argentina                        | ARG           | Latin America       |
| Armenia                          | ARM           | Rest of Asia        |
| Aruba                            | ABW           | Latin America       |
| Australia                        | AUS           | Rest of world       |
| Austria                          | AUT           | EU27 & the U.K.     |
| Azerbaijan                       | AZE           | Rest of Asia        |
| Bahamas                          | BHS           | Latin America       |
| Bahrain                          | BHR           | the Middle East     |
| Bangladesh                       | BGD           | Rest of Asia        |
| Barbados                         | BRB           | Latin America       |
| Belarus                          | BLR           | Rest of Europe      |
| Belgium                          | BEL           | EU27 & the U.K.     |
| Belize                           | BLZ           | Latin America       |
| Benin                            | BEN           | Rest of world       |
| Bermuda                          | BMU           | Latin America       |
| Bhutan                           | BTN           | Rest of Asia        |
| Bolivia                          | BOL           | Latin America       |
| Bonaire, Sint Eustatius and Saba | BES           | Latin America       |
| Bosnia and Herzegovina           | BIH           | Rest of Europe      |
| Botswana                         | BWA           | Rest of world       |
| Brazil                           | BRA           | Latin America       |
| Brunei Darussalam                | BRN           | Rest of Asia        |
| Bulgaria                         | BGR           | EU27 & the U.K.     |
| Burkina Faso                     | BFA           | Rest of world       |
| Burundi                          | BDI           | Rest of world       |
| Cape Verde                       | CPV           | Rest of world       |
| Cambodia                         | KHM           | Rest of Asia        |
| Cameroon                         | CMR           | Rest of world       |
| Canada                           | CAN           | Canada and the U.S. |
| Cayman Islands                   | CYM           | Latin America       |
| Central African Republic         | CAF           | Rest of world       |
| Chad                             | TCD           | Rest of world       |
| Chile                            | CHL           | Latin America       |

|                                                |     |                 |
|------------------------------------------------|-----|-----------------|
| China (including Hong Kong, Macao, and Taiwan) | CHN | China           |
| Colombia                                       | COL | Latin America   |
| Comoros                                        | COM | Rest of world   |
| Democratic Republic of Congo                   | COD | Rest of world   |
| Congo                                          | COG | Rest of world   |
| Cook Islands                                   | COK | Rest of world   |
| Costa Rica                                     | CRI | Latin America   |
| Croatia                                        | HRV | EU27 & the U.K. |
| Cuba                                           | CUB | Latin America   |
| Curacao                                        | CUW | Latin America   |
| Cyprus                                         | CYP | EU27 & the U.K. |
| Czech Republic                                 | CZE | EU27 & the U.K. |
| Cote d'Ivoire                                  | CIV | Rest of world   |
| Denmark                                        | DNK | EU27 & the U.K. |
| Djibouti                                       | DJI | Rest of world   |
| Dominica                                       | DMA | Latin America   |
| Dominican Republic                             | DOM | Latin America   |
| Ecuador                                        | ECU | Latin America   |
| Egypt                                          | EGY | Rest of world   |
| El Salvador                                    | SLV | Latin America   |
| Equatorial Guinea                              | GNQ | Rest of world   |
| Eritrea                                        | ERI | Rest of world   |
| Estonia                                        | EST | EU27 & the U.K. |
| Swaziland                                      | SWZ | Rest of world   |
| Ethiopia                                       | ETH | Rest of world   |
| Falkland Islands                               | FLK | Latin America   |
| Faeroe Islands                                 | FRO | Rest of Europe  |
| Fiji                                           | FJI | Rest of world   |
| Finland                                        | FIN | EU27 & the U.K. |
| France                                         | FRA | EU27 & the U.K. |
| French Guiana                                  | GUF | Latin America   |
| French Polynesia                               | PYF | Rest of world   |
| Gabon                                          | GAB | Rest of world   |
| Gambia                                         | GMB | Rest of world   |
| Georgia                                        | GEO | Rest of Asia    |
| Germany                                        | DEU | EU27 & the U.K. |
| Ghana                                          | GHA | Rest of world   |
| Gibraltar                                      | GIB | Rest of Europe  |
| Greece                                         | GRC | EU27 & the U.K. |
| Greenland                                      | GRL | Rest of Europe  |
| Grenada                                        | GRD | Latin America   |
| Guadeloupe                                     | GLP | Latin America   |
| Guam                                           | GUM | Rest of world   |

|                                       |     |                 |
|---------------------------------------|-----|-----------------|
| Guatemala                             | GTM | Latin America   |
| Guinea                                | GIN | Rest of world   |
| Guinea-Bissau                         | GNB | Rest of world   |
| Guyana                                | GUY | Latin America   |
| Haiti                                 | HTI | Latin America   |
| Honduras                              | HND | Latin America   |
| Hungary                               | HUN | EU27 & the U.K. |
| Iceland                               | ISL | Rest of Europe  |
| India                                 | IND | India           |
| Indonesia                             | IDN | Rest of Asia    |
| Islamic Republic of Iran              | IRN | the Middle East |
| Iraq                                  | IRQ | the Middle East |
| Ireland                               | IRL | EU27 & the U.K. |
| Isle of Man                           | IMN | Rest of Europe  |
| Israel                                | ISR | the Middle East |
| Italy                                 | ITA | EU27 & the U.K. |
| Jamaica                               | JAM | Latin America   |
| Japan                                 | JPN | Rest of Asia    |
| Jersey                                | JEY | Rest of Europe  |
| Jordan                                | JOR | the Middle East |
| Kazakhstan                            | KAZ | Rest of Asia    |
| Kenya                                 | KEN | Rest of world   |
| Kiribati                              | KIR | Rest of world   |
| Democratic People's Republic of Korea | PRK | Rest of Asia    |
| Republic of Korea                     | KOR | Rest of Asia    |
| Kuwait                                | KWT | the Middle East |
| Kyrgyzstan                            | KGZ | Rest of Asia    |
| Laos                                  | LAO | Rest of Asia    |
| Latvia                                | LVA | EU27 & the U.K. |
| Lebanon                               | LBN | the Middle East |
| Lesotho                               | LSO | Rest of world   |
| Liberia                               | LBR | Rest of world   |
| Libya                                 | LBY | Rest of world   |
| Liechtenstein                         | LIE | Rest of Europe  |
| Lithuania                             | LTU | EU27 & the U.K. |
| Luxembourg                            | LUX | EU27 & the U.K. |
| Madagascar                            | MDG | Rest of world   |
| Malawi                                | MWI | Rest of world   |
| Malaysia                              | MYS | Rest of Asia    |
| Maldives                              | MDV | Rest of Asia    |
| Mali                                  | MLI | Rest of world   |
| Malta                                 | MLT | EU27 & the U.K. |
| Marshall Islands                      | MHL | Rest of world   |

|                                |     |                 |
|--------------------------------|-----|-----------------|
| Martinique                     | MTQ | Latin America   |
| Mauritania                     | MRT | Rest of world   |
| Mauritius                      | MUS | Rest of world   |
| Mayotte                        | MYT | Rest of world   |
| Mexico                         | MEX | Latin America   |
| Federated States of Micronesia | FSM | Rest of world   |
| Moldova                        | MDA | Rest of Europe  |
| Mongolia                       | MNG | Rest of Asia    |
| Montenegro                     | MNE | Rest of Europe  |
| Montserrat                     | MSR | Latin America   |
| Morocco                        | MAR | Rest of world   |
| Mozambique                     | MOZ | Rest of world   |
| Myanmar                        | MMR | Rest of Asia    |
| Namibia                        | NAM | Rest of world   |
| Nauru                          | NRU | Rest of world   |
| Nepal                          | NPL | Rest of Asia    |
| Netherlands                    | NLD | EU27 & the U.K. |
| New Caledonia                  | NCL | Rest of world   |
| New Zealand                    | NZL | Rest of world   |
| Nicaragua                      | NIC | Latin America   |
| Niger                          | NER | Rest of world   |
| Nigeria                        | NGA | Rest of world   |
| Niue                           | NIU | Rest of world   |
| Norfolk Island                 | NFK | Rest of world   |
| North Macedonia                | MKD | Rest of Europe  |
| Northern Mariana Islands       | MNP | Rest of world   |
| Norway                         | NOR | Rest of Europe  |
| Oman                           | OMN | the Middle East |
| Pakistan                       | PAK | Rest of Asia    |
| Palau                          | PLW | Rest of world   |
| Palestine                      | PSE | the Middle East |
| Panama                         | PAN | Latin America   |
| Papua New Guinea               | PNG | Rest of world   |
| Paraguay                       | PRY | Latin America   |
| Peru                           | PER | Latin America   |
| Philippines                    | PHL | Rest of Asia    |
| Pitcairn                       | PCN | Rest of world   |
| Poland                         | POL | EU27 & the U.K. |
| Portugal                       | PRT | EU27 & the U.K. |
| Puerto Rico                    | PRI | Latin America   |
| Qatar                          | QAT | the Middle East |
| Romania                        | ROU | EU27 & the U.K. |
| Russia                         | RUS | Rest of Europe  |

|                              |     |                 |
|------------------------------|-----|-----------------|
| Rwanda                       | RWA | Rest of world   |
| Reunion                      | REU | Rest of world   |
| Saint Helena                 | SHN | Rest of world   |
| Saint Kitts and Nevis        | KNA | Latin America   |
| Saint Lucia                  | LCA | Latin America   |
| Saint Pierre and Miquelon    | SPM | Latin America   |
| Saint Vincent and Grenadines | VCT | Latin America   |
| Samoa                        | WSM | Rest of world   |
| Sao Tome and Principe        | STP | Rest of world   |
| Saudi Arabia                 | SAU | the Middle East |
| Senegal                      | SEN | Rest of world   |
| Serbia                       | SRB | Rest of Europe  |
| Seychelles                   | SYC | Rest of world   |
| Sierra Leone                 | SLE | Rest of world   |
| Singapore                    | SGP | Rest of Asia    |
| Sint Maarten                 | SXM | Latin America   |
| Slovakia                     | SVK | EU27 & the U.K. |
| Slovenia                     | SVN | EU27 & the U.K. |
| Solomon Islands              | SLB | Rest of world   |
| Somalia                      | SOM | Rest of world   |
| South Africa                 | ZAF | Rest of world   |
| South Sudan                  | SSD | Rest of world   |
| Spain                        | ESP | EU27 & the U.K. |
| Sri Lanka                    | LKA | Rest of Asia    |
| Sudan                        | SDN | Rest of world   |
| Suriname                     | SUR | Latin America   |
| Sweden                       | SWE | EU27 & the U.K. |
| Switzerland                  | CHE | Rest of Europe  |
| Syria                        | SYR | the Middle East |
| Tajikistan                   | TJK | Rest of Asia    |
| Tanzania                     | TZA | Rest of world   |
| Thailand                     | THA | Rest of Asia    |
| Timor-Leste                  | TLS | Rest of Asia    |
| Togo                         | TGO | Rest of world   |
| Tokelau                      | TKL | Rest of world   |
| Tonga                        | TON | Rest of world   |
| Trinidad and Tobago          | TTO | Latin America   |
| Tunisia                      | TUN | Rest of world   |
| Turkey                       | TUR | the Middle East |
| Turkmenistan                 | TKM | Rest of Asia    |
| Turks and Caicos Islands     | TCA | Latin America   |
| Tuvalu                       | TUV | Rest of world   |
| Uganda                       | UGA | Rest of world   |



|                              |     |                     |
|------------------------------|-----|---------------------|
| Ukraine                      | UKR | Rest of Europe      |
| United Arab Emirates         | ARE | the Middle East     |
| United Kingdom               | GBR | EU27 & the U.K.     |
| United States                | USA | Canada and the U.S. |
| Uruguay                      | URY | Latin America       |
| Uzbekistan                   | UZB | Rest of Asia        |
| Vanuatu                      | VUT | Rest of world       |
| Venezuela                    | VEN | Latin America       |
| Vietnam                      | VNM | Rest of Asia        |
| British Virgin Islands       | VGB | Latin America       |
| United States Virgin Islands | VIR | Latin America       |
| Wallis and Futuna Islands    | WLF | Rest of world       |
| Western Sahara               | ESH | Rest of world       |
| Yemen                        | YEM | the Middle East     |
| Zambia                       | ZMB | Rest of world       |
| Zimbabwe                     | ZWE | Rest of world       |

**Table S3.** The types and data sources of activity rates for the source categories.

| 1 <sup>st</sup> level            | 2 <sup>nd</sup> level         | Activity rate type | Activity rate data source   |
|----------------------------------|-------------------------------|--------------------|-----------------------------|
| Power generation                 | Coal                          |                    |                             |
| Heat (auto producer)             | (Anthracite, Coking coal,     |                    |                             |
| Heat (public)                    | Other bituminous coal, Sub-   |                    |                             |
| Coal mines                       | bituminous coal, Lignite,     |                    |                             |
| Oil and gas extraction           | Patent fuel, Coke oven coke,  |                    |                             |
| Blast furnaces                   | Gas coke, Coal tar, BKB, Gas  |                    |                             |
| Gas works                        | works gas, Coke oven gas,     |                    |                             |
| Gasification plants for biogases | Blast furnace gas, Other      |                    |                             |
| Coke ovens                       | recovered gases, Peat, Peat   |                    |                             |
| Patent fuel plants               | products)                     |                    |                             |
| BKB/peat briquette plants        |                               |                    |                             |
| Oil refineries                   | Oil                           |                    |                             |
| Coal liquefaction plants         | (Crude oil, Natural gas       |                    |                             |
| Liquefaction (LNG) /             | liquids, Refinery feedstocks, |                    |                             |
| regasification plants            | Additives/blending            |                    |                             |
| Gas-to-liquids (GTL) plants      | components, Other             |                    |                             |
| Own use in electricity, CHP and  | hydrocarbons, Refinery gas,   |                    |                             |
| heat plants                      | Ethane, Liquefied petroleum   |                    |                             |
| Charcoal production plants       | gases (LPG), Motor gasoline   |                    |                             |
| Non-specified transformation     | excluding biofuels, Aviation  |                    |                             |
| industries                       | gasoline, Gasoline type jet   | Fuel consumption   | IEA World Energy Statistics |
| Iron and steel                   | fuel, Kerosene type jet fuel  |                    |                             |
| Non-ferrous metals               | excluding biofuels, Other     |                    |                             |
| Chemicals                        | kerosene, Gas/diesel oil      |                    |                             |
| Pulp and paper                   | excluding biofuels, Fuel oil, |                    |                             |
| Food and tobacco                 | Naphtha, White spirit and     |                    |                             |
| Cement                           | SBP, Lubricants, Bitumen,     |                    |                             |
| Other non-metallic minerals      | Paraffin waxes, Petroleum     |                    |                             |
| Transport equipment              | coke, Other oil products, Oil |                    |                             |
| Machinery                        | shale and oil sands)          |                    |                             |
| Mining and quarrying             | Natural gas                   |                    |                             |
| Wood products                    | (Natural gas)                 |                    |                             |
| Construction                     |                               |                    |                             |
| Textile and leather              | Biomass                       |                    |                             |
| Other non-specified industries   | (Renewable municipal waste,   |                    |                             |
| International aviation           | Primary solid biofuels,       |                    |                             |
| Domestic aviation                | Biogases, Bio gasoline,       |                    |                             |
| Rail                             | Biodiesels, Bio jet kerosene, |                    |                             |
| International navigation         | Other liquid biofuels, Non-   |                    |                             |
| Domestic navigation              | specified primary             |                    |                             |

|                                  |                                                               |                       |                                                                                                    |
|----------------------------------|---------------------------------------------------------------|-----------------------|----------------------------------------------------------------------------------------------------|
| Pipeline transport               | biofuels/waste, Charcoal)                                     |                       |                                                                                                    |
| Other non-specified transport    |                                                               |                       |                                                                                                    |
| Agriculture and forestry         |                                                               |                       |                                                                                                    |
| Fishing                          |                                                               |                       |                                                                                                    |
| Cars                             |                                                               |                       |                                                                                                    |
| Light duty trucks                |                                                               |                       |                                                                                                    |
| Buses                            |                                                               |                       |                                                                                                    |
| Heavy duty trucks                |                                                               |                       |                                                                                                    |
| Motorcycles                      |                                                               |                       |                                                                                                    |
| Other fleet totals               |                                                               |                       |                                                                                                    |
| Commercial and institutional     |                                                               |                       |                                                                                                    |
| Residential (rural)              |                                                               |                       |                                                                                                    |
| Residential (urban)              |                                                               |                       |                                                                                                    |
| Non-specified sectors            |                                                               |                       |                                                                                                    |
| Fugitive (solid fuel production) | Coke oven coke production                                     | Production            | UNdata                                                                                             |
| Fugitive (oil and gas)           | Oil production                                                | Crude oil production  | IEA World Oil Statistics                                                                           |
|                                  | Oil storage and transport                                     | Crude oil production  |                                                                                                    |
|                                  | Oil refining                                                  | Refinery gross output |                                                                                                    |
|                                  | Gasoline storage                                              | Motor gasoline demand |                                                                                                    |
|                                  | Gasoline distribution                                         | Motor gasoline demand |                                                                                                    |
|                                  | Diesel storage                                                | Gas/diesel oil demand |                                                                                                    |
|                                  | Venting and flaring                                           | Crude oil production  |                                                                                                    |
|                                  | Flaring in oil refinery                                       | Refinery gross output |                                                                                                    |
|                                  | Natural gas production, processing, storage, and distribution | Indigenous production | IEA World Natural Gas Statistics                                                                   |
|                                  | Gas venting and flaring                                       | Indigenous production |                                                                                                    |
| Mineral industry                 | Cement production                                             | Production            | USGS                                                                                               |
|                                  | Clicker production                                            |                       | UN Data, UNFCCC dataset, and official websites of National Bureau of Statistics in large economies |
|                                  | Glass production                                              |                       |                                                                                                    |
| Chemical industry (inorganic)    | Ammonia                                                       | Production            | USGS                                                                                               |
|                                  | Carbon black                                                  |                       | UNdata, UN statistics, and UNFCCC                                                                  |
| Chemical industry (organic)      | Adipic acid                                                   | Production            | UNdata, UN statistics, and UNFCCC                                                                  |
|                                  | Ethylene                                                      |                       |                                                                                                    |
|                                  | Vinyl chloride                                                |                       |                                                                                                    |
|                                  | Styrene                                                       |                       |                                                                                                    |
|                                  | Low density polyethylene (LDPE)                               |                       |                                                                                                    |
|                                  | High density polyethylene                                     |                       |                                                                                                    |

|                                      |                           |                            |                                                   |
|--------------------------------------|---------------------------|----------------------------|---------------------------------------------------|
| Chemical industry<br>(manufacturing) | (HDPE)                    | Production                 | UNdata, UN statistics, and<br>UNFCCC              |
|                                      | Polyvinyl chloride (PVC)  |                            |                                                   |
|                                      | Polypropylene (PP)        |                            |                                                   |
|                                      | Polystyrene (PS)          |                            |                                                   |
|                                      | SAN & ABS resins          |                            |                                                   |
|                                      | Other synthetic resins    |                            |                                                   |
|                                      | Ethylene oxide            |                            |                                                   |
|                                      | Methanol                  |                            |                                                   |
|                                      | Acrylonitrile             |                            |                                                   |
|                                      | Glyoxylic acid            |                            |                                                   |
|                                      | Synthetic rubber          |                            |                                                   |
|                                      | Tyre production           |                            |                                                   |
|                                      | Pharmaceutical production |                            |                                                   |
| Metal industry                       | Asphalt                   | Production                 | FAOSTAT                                           |
|                                      | Paint production          |                            |                                                   |
|                                      | Printing ink production   |                            |                                                   |
|                                      | Glues production          |                            |                                                   |
|                                      | Shoes production          |                            |                                                   |
|                                      | Leather tanning           |                            |                                                   |
|                                      | Synthetic fibre           |                            |                                                   |
|                                      | Wool                      |                            |                                                   |
|                                      | Silk                      |                            |                                                   |
|                                      | Cloth                     |                            |                                                   |
| Pulp, paper, and food industry       | Artificial fibre          | Production                 | UNdata, UN statistics, and<br>UNFCCC              |
|                                      | Sinter production         |                            |                                                   |
|                                      | Pellet production         |                            |                                                   |
|                                      | Pig iron production       |                            |                                                   |
|                                      | DRI production            |                            |                                                   |
| Paint use                            | Steel production          | Paint apparent consumption | UNdata, UN statistics,<br>UNFCCC, and UN Comtrade |
|                                      | Paper pulp                |                            |                                                   |
|                                      | Paper                     |                            |                                                   |
|                                      | Plywood                   |                            |                                                   |
|                                      | Bread                     |                            |                                                   |
|                                      | Biscuit                   |                            |                                                   |
|                                      | Sugar                     |                            |                                                   |
|                                      | Flour                     |                            |                                                   |
|                                      | Oilseed                   |                            |                                                   |
|                                      | Beer                      |                            |                                                   |
| Paint use                            | Wine                      | Paint apparent consumption | UNdata, UN statistics,<br>UNFCCC, and UN Comtrade |
|                                      | Spirit                    |                            |                                                   |
|                                      | Architecture other        |                            |                                                   |

|                      |                         |                                   |                                                                            |
|----------------------|-------------------------|-----------------------------------|----------------------------------------------------------------------------|
|                      | Vehicle manufacturing   |                                   |                                                                            |
|                      | Vehicle repairing       |                                   |                                                                            |
|                      | Wood                    |                                   |                                                                            |
|                      | Other industrial paint  |                                   |                                                                            |
| Other industrial use | Vehicle dewax           | Vehicle ownership                 | On-road vehicle model (Yan et al., 2024)                                   |
|                      | Vehicle reseal          | Population                        | UN                                                                         |
|                      | Printing ink use        | Printing ink apparent consumption | UNdata, UN statistics, UNFCCC, and UN Comtrade                             |
|                      | Glues and adhesives use | Glues apparent consumption        |                                                                            |
|                      | Preservation of wood    | Amount of wood preserved          | UNdata, UN statistics, and UNFCCC                                          |
|                      | Degreasing              | Amount of degreasing solvent      | Estimated from printing ink consumption (Li et al., 2017; Li et al., 2019) |
|                      | Dry cleaning            | Population                        | UN                                                                         |
| Domestic use         | Domestic use            | Population                        | UN                                                                         |
|                      | Pesticide               | Pesticide consumption             | FAOSTAT                                                                    |

**Table S4.** Unabated emission factors.

| 1 <sup>st</sup> level  | 2 <sup>nd</sup> level | 3 <sup>rd</sup> level | Unit             | Reference  | Emission factor            |
|------------------------|-----------------------|-----------------------|------------------|------------|----------------------------|
| Power generation       | Coal                  |                       |                  |            |                            |
| Heat (auto producer)   | (Anthracite, Coking   |                       |                  |            |                            |
| Heat (public)          | coal, Other           |                       |                  |            |                            |
| Coal mines             | bituminous coal,      |                       |                  |            |                            |
| Oil and gas extraction | Sub-bituminous        |                       |                  |            |                            |
| Blast furnaces         | coal, Lignite, Patent |                       |                  |            |                            |
| Gas works              | fuel, Coke oven       |                       |                  |            |                            |
| Gasification plants    | coke, Gas coke,       |                       |                  |            |                            |
| for biogases           | Coal tar, BKB, Gas    |                       |                  |            |                            |
| Coke ovens             | works gas, Coke       |                       |                  |            |                            |
| Patent fuel plants     | oven gas, Blast       |                       |                  |            | Bituminous coal: 0.025     |
| BKB/peat briquette     | furnace gas, Other    |                       | g/kg             |            | Sub-bituminous coal: 0.025 |
| plants                 | recovered gases,      |                       | (solid and       | US EPA,    | Lignite: 0.015             |
| Oil refineries         | Peat, Peat products)  |                       | liquid)          | 1995; EEA, | Other coal: 0.02           |
| Coal liquefaction      |                       |                       | g/m <sup>3</sup> | 2023       | Oil: 0.10                  |
| plants                 | Oil                   |                       | (gas)            |            | Gas: 0.088                 |
| Liquefaction (LNG) /   | (Crude oil, Natural   |                       |                  |            | Biomass: 0.11              |
| regasification plants  | gas liquids,          |                       |                  |            |                            |
| Gas-to-liquids (GTL)   | Refinery              |                       |                  |            |                            |
| plants                 | feedstocks,           |                       |                  |            |                            |
| Own use in             | Additives/blending    | None                  |                  |            |                            |
| electricity, CHP and   | components, Other     |                       |                  |            |                            |
| heat plants            | hydrocarbons,         |                       |                  |            |                            |
| Charcoal production    | Refinery gas,         |                       |                  |            |                            |
| plants                 | Ethane, Liquefied     |                       |                  |            |                            |
| Non-specified          | petroleum gases       |                       |                  |            |                            |
| transformation         | (LPG), Motor          |                       |                  |            |                            |
| industries             | gasoline excluding    |                       |                  |            |                            |
| Iron and steel         | biofuels, Aviation    |                       |                  |            |                            |
| Non-ferrous metals     | gasoline, Gasoline    |                       |                  |            |                            |
| Chemicals              | type jet fuel,        |                       |                  |            |                            |
| Pulp and paper         | Kerosene type jet     |                       |                  |            |                            |
| Food and tobacco       | fuel excluding        |                       | g/kg             | EEA, 2023; | Coal: 1.78                 |
| Cement                 | biofuels, Other       |                       | (solid and       | Li et al., | Oil: 0.11                  |
| Other non-metallic     | kerosene,             |                       | liquid)          | 2019;      | Natural gas: 0.14          |
| minerals               | Gas/diesel oil        |                       | g/m <sup>3</sup> | Klimont et | Other gases:               |
| Transport equipment    | excluding biofuels,   |                       | (gas)            | al., 2002  | 0.012-0.08                 |
| Machinery              | Fuel oil, Naphtha,    |                       |                  |            | Biomass: 0.75              |
| Mining and quarrying   | White spirit and      |                       |                  |            |                            |
| Wood products          | SBP, Lubricants,      |                       |                  |            |                            |
| Construction           | Bitumen, Paraffin     |                       |                  |            |                            |

|                                |                                                       |                             |                         |                                                 |                                                                                                                                                                       |
|--------------------------------|-------------------------------------------------------|-----------------------------|-------------------------|-------------------------------------------------|-----------------------------------------------------------------------------------------------------------------------------------------------------------------------|
| Textile and leather            | waxes, Petroleum                                      |                             |                         |                                                 |                                                                                                                                                                       |
| Other non-specified industries | coke, Other oil products, Oil shale and oil sands)    |                             |                         |                                                 |                                                                                                                                                                       |
| International aviation         |                                                       | LTO and cruise              |                         | Engine-, flight-condition-, and fuel-dependent; |                                                                                                                                                                       |
| Domestic aviation              |                                                       |                             |                         | See Supplementary Text S2                       |                                                                                                                                                                       |
| Rail                           | Natural gas (Natural gas)                             |                             | g/kg                    | EEA, 2023                                       | Coal: 3.48<br>Oil: 4.65                                                                                                                                               |
| International navigation       | Biomass                                               |                             |                         |                                                 | Shipping-route-dependent;                                                                                                                                             |
| Domestic navigation            | (Renewable                                            |                             |                         |                                                 | See Supplementary Text S2                                                                                                                                             |
| Pipeline transport             | municipal waste, Primary solid                        | None                        | g/kg (solid and liquid) | EEA, 2023                                       | Oil: 0.22<br>Gas: 0.06                                                                                                                                                |
| Other non-specified transport  | biofuels, Biogases, Bio gasoline, Biodiesels, Bio jet |                             | g/m <sup>3</sup> (gas)  | EEA, 2023                                       | Gasoline: 150.18<br>Diesel: 8.08                                                                                                                                      |
| Agriculture and forestry       | kerosene, Other liquid biofuels,                      | Emission standards          |                         | Emission-standard-dependent;                    |                                                                                                                                                                       |
| Fishing                        | Non-specified                                         |                             |                         | See Supplementary Text S2                       |                                                                                                                                                                       |
| Cars                           | primary                                               | Running, start,             |                         |                                                 |                                                                                                                                                                       |
| Light duty trucks              | biofuels/waste,                                       | evaporation                 |                         |                                                 |                                                                                                                                                                       |
| Buses                          | Charcoal)                                             | (Stage 0, Stage 1, Stage 2, |                         | Mode- and emission-standard-dependent;          |                                                                                                                                                                       |
| Heavy duty trucks              |                                                       | Stage 3, Stage 4, Stage 5,  |                         | See Supplementary Text S2                       |                                                                                                                                                                       |
| Motorcycles                    |                                                       | Stage 6, Stage 7)           |                         |                                                 |                                                                                                                                                                       |
| Other fleet totals             |                                                       |                             |                         |                                                 | Coal: 2<br>Oil: 0.66<br>Natural gas: 0.04<br>Other gases: 0.02-0.03<br>Biomass: 4.68<br>Coal: 0.46<br>Biomass: 0.19<br>Other fuels are the same as traditional stove. |
| Commercial and institutional   |                                                       | Traditional                 | g/kg (solid and liquid) | EEA, 2023                                       |                                                                                                                                                                       |
|                                |                                                       |                             | g/m <sup>3</sup> (gas)  |                                                 |                                                                                                                                                                       |
|                                |                                                       | Advanced                    |                         |                                                 |                                                                                                                                                                       |
| Residential (rural)            |                                                       | Traditional                 | g/kg (solid and liquid) | EEA, 2023; Keita et al., 2021                   | Natural gas: 0.07<br>Other gases: 0.005-0.04<br>Biomass: 9.36<br>EFs in Keita et al., 2021 are used for Africa                                                        |
|                                |                                                       |                             | g/m <sup>3</sup> (gas)  |                                                 |                                                                                                                                                                       |
| Residential (urban)            |                                                       | Advanced                    |                         |                                                 | Coal: 6<br>Biomass: 3.9                                                                                                                                               |

|                                  |                                                               | Other fuels are the same as traditional stove |                                                                                |                                       |       |
|----------------------------------|---------------------------------------------------------------|-----------------------------------------------|--------------------------------------------------------------------------------|---------------------------------------|-------|
| Non-specified sectors            |                                                               | None                                          | The same as residential                                                        |                                       |       |
| Fugitive (solid fuel production) | Coke oven coke production                                     | None                                          | g/kg                                                                           | Klimont et al., 2002; Bo et al., 2008 | 1.345 |
|                                  |                                                               |                                               |                                                                                |                                       |       |
| Fugitive (oil and gas)           | Oil production                                                | None                                          | g/kg                                                                           |                                       | 0.2   |
|                                  | Oil storage and transport                                     |                                               |                                                                                | EEA, 2023;                            | 0.2   |
|                                  | Oil refining                                                  |                                               |                                                                                | Li et al., 2019                       | 1.11  |
|                                  | Gasoline storage                                              |                                               |                                                                                |                                       | 1.97  |
|                                  | Gasoline distribution                                         |                                               |                                                                                |                                       | 4.26  |
|                                  | Diesel storage                                                |                                               | g/m <sup>3</sup>                                                               | US EPA, 1995                          | 0.002 |
|                                  | Venting and flaring                                           |                                               |                                                                                |                                       | 1.25  |
|                                  | Flaring in oil refinery                                       |                                               |                                                                                | EEA, 2023                             | 0.002 |
|                                  | Natural gas production, processing, storage, and distribution |                                               |                                                                                | EEA, 2023                             | 0.1   |
|                                  | Gas venting and flaring                                       |                                               |                                                                                | EEA, 2023                             | 0.243 |
| Mineral industry                 | Cement production                                             | None                                          | To avoid double counting, emissions are only calculated in combustion sources. |                                       |       |
|                                  | Clicker production                                            |                                               |                                                                                |                                       |       |
|                                  | Glass production                                              |                                               | g/kg                                                                           | US EPA, 1995                          | 0.1   |
| Chemical industry (inorganic)    | Ammonia                                                       | None                                          | g/kg                                                                           | US EPA, 1995, 2001                    | 4.72  |
|                                  | Carbon black                                                  |                                               |                                                                                |                                       | 53.57 |
| Chemical industry (organic)      | Adipic acid                                                   | None                                          | g/kg                                                                           | US EPA, 1995, 2001                    | 4.79  |
|                                  | Ethylene                                                      |                                               |                                                                                |                                       | 0.6   |
|                                  | Vinyl chloride                                                |                                               |                                                                                |                                       | 2.5   |
|                                  | Styrene                                                       |                                               |                                                                                |                                       | 1     |
|                                  | Low density polyethylene (LDPE)                               |                                               |                                                                                | EEA, 2023                             | 2.4   |
|                                  | High density polyethylene (HDPE)                              |                                               |                                                                                |                                       | 2.3   |
|                                  | Polyvinyl chloride                                            |                                               |                                                                                | US EPA,                               | 8.5   |
|                                  |                                                               |                                               |                                                                                |                                       |       |



|                                      |                           |      |  |  |      |                                                                            |                                  |          |
|--------------------------------------|---------------------------|------|--|--|------|----------------------------------------------------------------------------|----------------------------------|----------|
|                                      | (PVC)                     |      |  |  |      | 1995, 2001                                                                 |                                  |          |
|                                      | Polypropylene (PP)        |      |  |  |      | EEA, 2023                                                                  | 4                                |          |
|                                      |                           |      |  |  |      | US EPA,                                                                    |                                  |          |
|                                      | Polystyrene (PS)          |      |  |  |      | 1995, 2001;<br>Li et al.,<br>2019                                          | 21.15                            |          |
|                                      | SAN & ABS resins          |      |  |  |      |                                                                            | 3                                |          |
|                                      | Other synthetic resins    |      |  |  |      | EEA, 2023                                                                  | 8                                |          |
|                                      | Ethylene oxide            |      |  |  |      |                                                                            | 2                                |          |
|                                      | Methanol                  |      |  |  |      | US EPA,<br>1995, 2001                                                      | 1.5                              |          |
|                                      | Acrylonitrile             |      |  |  |      |                                                                            | 1                                |          |
|                                      | Glyoxylic acid            |      |  |  |      | EEA, 2023                                                                  | 8                                |          |
| Chemical industry<br>(manufacturing) | Synthetic rubber          | None |  |  | g/kg | EEA, 2023                                                                  | 8                                |          |
|                                      | Tyre production           |      |  |  |      | Related to average type weight of the fleets;<br>See Supplementary Text S2 |                                  |          |
|                                      | Pharmaceutical production |      |  |  |      | EEA, 2023                                                                  | 300                              |          |
|                                      | Asphalt                   |      |  |  |      | US EPA,                                                                    | 2.516                            |          |
|                                      | Paint production          |      |  |  |      | 1995, 2001                                                                 | 15                               |          |
|                                      | Printing ink production   |      |  |  |      | US EPA,<br>1995, 2001;<br>Li et al.,<br>2019                               | 60                               |          |
|                                      | Glues production          |      |  |  |      |                                                                            | 11                               |          |
|                                      | Shoes production          |      |  |  |      | t/pair                                                                     | EEA, 2023                        | 0.000045 |
|                                      | Leather tanning           |      |  |  |      |                                                                            | He, 2015                         | 0. 18    |
|                                      | Synthetic fibre           |      |  |  |      |                                                                            |                                  | 10       |
|                                      | Wool                      |      |  |  |      | g/kg                                                                       | EEA, 2023;<br>Li et al.,<br>2019 | 10       |
|                                      | Silk                      |      |  |  |      |                                                                            |                                  | 10       |
|                                      | Cloth                     |      |  |  |      |                                                                            |                                  | 23       |
|                                      | Artificial fibre          |      |  |  |      |                                                                            | US EPA,<br>1995, 2001            | 103.7    |
| Metal industry                       | Sinter production         | None |  |  | g/kg | EEA, 2023                                                                  | 0.138                            |          |
|                                      | Pellet production         |      |  |  |      |                                                                            | 0.014                            |          |
|                                      | Pig iron production       |      |  |  |      |                                                                            | 0                                |          |
|                                      | DRI production            |      |  |  |      |                                                                            | 0                                |          |
|                                      |                           |      |  |  |      |                                                                            | EAF                              | 0.046    |
|                                      | Steel production          |      |  |  |      |                                                                            | BOF                              | 0.027    |
|                                      |                           |      |  |  |      |                                                                            | OHF                              | 0.027    |
| Pulp, paper, and food<br>industry    | Paper pulp                | None |  |  | g/kg | EEA, 2023                                                                  | 2                                |          |
|                                      | Paper                     |      |  |  |      | US EPA,                                                                    | 0.1                              |          |

|                      |                             |               |                   |                           |
|----------------------|-----------------------------|---------------|-------------------|---------------------------|
|                      |                             |               | 1995, 2001        |                           |
|                      | Plywood                     |               | US EPA,           | 500                       |
|                      |                             |               | 1995, 2001;       |                           |
|                      |                             |               | Li et al.,        |                           |
|                      |                             |               | 2019              |                           |
|                      | Bread                       |               |                   | 6.25                      |
|                      | Biscuit                     |               |                   | 1                         |
|                      | Sugar                       |               |                   | 10                        |
|                      | Flour                       |               | EEA, 2023         | 2                         |
|                      | Oilseed                     |               |                   | 1.57                      |
| Paint use            | Beer                        |               |                   | 0.35                      |
|                      | Wine                        |               | US EPA,           | 0.7                       |
|                      | Spirit                      |               | 1995, 2001        | 1560                      |
|                      | Architectural interior wall | Waterborne    | g/kg              | 180                       |
|                      |                             | Solvent-based |                   | 620                       |
|                      | Architecture other          | Waterborne    |                   | 300                       |
|                      |                             | Solvent-based |                   | 620                       |
|                      | Vehicle manufacturing       | Waterborne    |                   | 50                        |
|                      |                             | Solvent-based |                   | 730                       |
|                      | Vehicle repairing           | Waterborne    |                   | 150                       |
|                      |                             | Solvent-based |                   | 750                       |
|                      | Wood                        | Waterborne    |                   | 225                       |
|                      |                             | Solvent-based |                   | 660                       |
| Other industrial use | Other industrial paint      | Waterborne    |                   | 150                       |
|                      |                             | Solvent-based |                   | 440                       |
|                      | Vehicle dewax               |               | kg/vehicle        | EEA, 2023                 |
|                      | Vehicle reseal              |               |                   | Population-based          |
|                      |                             |               |                   | See Supplementary Text S2 |
|                      | Printing ink use            |               | US EPA,           | 575                       |
|                      |                             |               | 1995, 2001;       |                           |
|                      |                             |               | Li et al.,        |                           |
|                      |                             |               | 2019              |                           |
|                      | Glues and adhesives use     | None          |                   | EEA, 2023                 |
|                      | Preservation of wood        |               | kg/m <sup>3</sup> | EEA, 2023                 |
|                      | Degreasing                  |               | g/kg              | US EPA, 1995, 2001        |
|                      | Dry cleaning                |               |                   | Population-based          |
|                      |                             |               |                   | See Supplementary Text S2 |
| Domestic use         | Domestic use                | None          |                   | Population-based          |
|                      |                             |               |                   | See Supplementary Text S2 |

|           |      |                                              |        |
|-----------|------|----------------------------------------------|--------|
|           |      | US EPA,<br>1995, 2001;<br>Li et al.,<br>2019 |        |
| Pesticide | g/kg |                                              | 356.16 |

**Table S5.** Regional proportions of advanced stove for residential coal and biomass combustion.

| <b>Region</b>       | <b>1970</b> | <b>1990</b> | <b>2010</b> | <b>2020</b> |
|---------------------|-------------|-------------|-------------|-------------|
| China               | 7.3%        | 9.7%        | 38.4%       | 51.2%       |
| India               | 5.6%        | 10.3%       | 23.8%       | 37.0%       |
| Middle East         | 33.7%       | 46.7%       | 56.9%       | 64.5%       |
| Rest of Asia        | 8.2%        | 15.0%       | 23.6%       | 25.1%       |
| Canada and the U.S. | 71.3%       | 80.3%       | 88.3%       | 90.6%       |
| Latin America       | 33.1%       | 42.7%       | 52.6%       | 57.9%       |
| EU27 and the U.K.   | 59.2%       | 67.0%       | 71.7%       | 73.3%       |
| Rest of Europe      | 46.2%       | 53.5%       | 55.5%       | 53.1%       |
| Rest of world       | 13.2%       | 15.5%       | 20.8%       | 24.4%       |

**Table S6.** Region mapping to typical regions for NMVOC emission control policies/legislation.

| <b>Region</b>                                          | <b>Mapping to</b> |
|--------------------------------------------------------|-------------------|
| Canada                                                 | the U.S.          |
| Norway and Switzerland                                 | EU                |
| South Korea                                            | Japan             |
| Australia, New Zealand, and other developing countries | EU                |

**Table S7.** Control technologies and removal efficiencies (EEA, 2023; EU-BRITE, 2006, 2007a, 2007b, 2007c, 2015, 2017, 2019; US EPA, 2001; US EPA, 2007; Li et al., 2019).

| Source category                                                                                                                                      | Control technology                                                     | Removal efficiency |
|------------------------------------------------------------------------------------------------------------------------------------------------------|------------------------------------------------------------------------|--------------------|
| Oil production                                                                                                                                       | Leak detection and repair (LDAR)                                       | 43%-81%            |
| Oil storage and transport                                                                                                                            | Vapor recovery (absorption and adsorption)                             | 90%-95%            |
|                                                                                                                                                      | Vapor recovery (cooling/condensation and membrane separation)          | 90%-98%            |
| Oil refining                                                                                                                                         | LDAR + exhaust absorption and adsorption                               | 70%-75%            |
|                                                                                                                                                      | LDAR + partial burn with CO boiler or full burn regeneration           | 90%                |
| Gasoline storage                                                                                                                                     | Stage I control (vapor balance and vapor recovery unit)                | 95%-98%            |
| Gasoline distribution                                                                                                                                | Stage II control (passive and active systems)                          | 70%-85%            |
| Diesel storage                                                                                                                                       | -                                                                      | -                  |
| Venting and flaring                                                                                                                                  | The same as oil production                                             |                    |
| Flaring in oil refinery                                                                                                                              | The same as oil refinery                                               |                    |
| Natural-gas-related sources                                                                                                                          | -                                                                      | -                  |
| Chemical industry (organic) (adipic acid, ethylene, vinyl chloride, styrene, ethylene oxide, methanol, ethyl alcohol, acrylonitrile, glyoxylic acid) | LDAR + exhaust absorption and adsorption                               | 79%                |
|                                                                                                                                                      | LDAR + exhaust incineration                                            | 90%                |
| Chemical industry (organic) (PE, PS, PVC, PP, resins, fibres)                                                                                        | LDAR + exhaust absorption and adsorption                               | 47%                |
|                                                                                                                                                      | LDAR + exhaust incineration                                            | 66%-80%            |
| Chemical industry (manufacturing) (rubber, tyre)                                                                                                     | LDAR + exhaust absorption and adsorption                               | 48%                |
|                                                                                                                                                      | LDAR + exhaust incineration                                            | 75%                |
| Chemical industry (manufacturing) (paint, printing ink, glue and adhesive)                                                                           | LDAR + exhaust absorption and adsorption                               | 70%                |
|                                                                                                                                                      | LDAR + exhaust incineration + use of good practices + solvent recovery | 80%-85%            |
| Chemical industry (others); Paper industry; Food industry                                                                                            | Referred to chemical industry above                                    | 60%-90%            |
| Paint use (architectural)                                                                                                                            | Improved application technology + High-efficiency spraying equipment   | 20%-40%            |
| Paint use (vehicle manufacturing)                                                                                                                    | Activated carbon adsorption/absorption                                 | 40%                |
|                                                                                                                                                      | Thermal incineration + electrostatic spraying                          | 60%                |

|                                  |                                                                                                         |         |
|----------------------------------|---------------------------------------------------------------------------------------------------------|---------|
| Paint use (wood)                 | Activated carbon adsorption/absorption                                                                  | 76%     |
|                                  | Thermal incineration + electrostatic spraying                                                           | 90%     |
| Paint (others)                   | Referred to the technologies above                                                                      | 50%-81% |
| Vehicle dewax;<br>Vehicle reseal | Improved application technology                                                                         | 20%     |
| Printing ink use                 | Activated carbon adsorption/absorption                                                                  | 48%     |
|                                  | Reduced consumption of isopropanol and of cleaning agents with high flash points + thermal incineration | 76%     |
| Glues and adhesives use          | Activated carbon adsorption or condensation                                                             | 70%     |
|                                  | Thermal incineration                                                                                    | 80%     |
| Preservation of wood             | Activated carbon adsorption or condensation                                                             | 67%     |
|                                  | Enclosure of drying and other areas and venting through end-of-pipe controls such as                    | 90%     |
|                                  | condensation or incineration                                                                            |         |
| Degreasing                       | Open-top degreaser with activated carbon filter                                                         | 80%     |
|                                  | Closed degreaser using A3 solvents or fluoro solvents (HFC and HFE) with activated carbon filter        | 97%     |
| Dry cleaning                     | Open-circuit machine with activated carbon filter                                                       | 70%     |
|                                  | New generation closed-circuit PER machine                                                               | 95%     |
| Other solvent use                | Referred to paint use (architectural)                                                                   | 20%-40% |

**Table S8.** The values of parameters used in S-shaped curves ( $X(t) = (X_0 - X_f)e^{\left(\frac{-(t-t_0)^2}{2s^2}\right)} + X_f$ ).

| Parameter | Value                                |
|-----------|--------------------------------------|
| $X_0$     | 0                                    |
| $X_f$     | 100                                  |
| $t_0$     | Start year of the policy/legislaiton |
| $s$       | 5                                    |



**Table S9.** Data sources of supplementary regional and global activity rates for chemical industry.

| Region                                                                                                                                                        | Data sources                                                                                                                                                                                                                                                                      |
|---------------------------------------------------------------------------------------------------------------------------------------------------------------|-----------------------------------------------------------------------------------------------------------------------------------------------------------------------------------------------------------------------------------------------------------------------------------|
| United States and Canada                                                                                                                                      | Morikis, 2019; Qu, 2000; Chew et al., 1985; IFSC, 1972; Greiner and Veleva, 2004; Croll, 2009; Shi, 1984; Timetric, 2011; Liu, 2007; Zheng, 1996; Guo, 1999; Bo, 2012                                                                                                             |
| EU countries<br>(Germany, France, Italy, the U.K.,<br>Netherlands, Belgium, Sweden,<br>Austria, Denmark, Portugal; Spain,<br>Croatia, Poland, Hungary, Czech) | Behm and Schlachta, 2019; Qu, 2000; Chew et al., 1985; IFSC, 1972; van Broekhuizen et al., 2000; ICI Paints, 1989; Kougoulis et al., 2012; Shi, 1984; Timetric, 2011; Gagro, 2021; Liu, 2007; Zheng, 1996; Guo, 1999; Bo, 2012                                                    |
| Non-EU European countries<br>(Switzerland, Norway, Russia, CIS<br>countries)                                                                                  | Chew et al., 1985; IFSC, 1972; van Broekhuizen et al., 2000; Woodex, 2020; Xu, 2002; Timetric, 2011; Liu, 2007; Zheng, 1996; Zhuang, 1996; Bo, 2012                                                                                                                               |
| China                                                                                                                                                         | Li et al., 2017; Li et al., 2019                                                                                                                                                                                                                                                  |
| Other Asia<br>(Japan, India, South Korea,<br>Indonesia, Malaysia, Phillippines,<br>Thailand, Vietnam)                                                         | Qu, 2000; Chew et al., 1985; IFSC, 1972; CBC, 2017; Liu, 2018; Zhong, 2019; Punmiya, 2020; KAISAI Paint, 2019; Shi, 1984; Timetric, 2011; Liu, 2007; Zheng, 1996; Zhuang, 1996; Guo, 1999; Bo, 2012                                                                               |
| Latin America (Brazil, Argentina,<br>Colombia, Mexico)                                                                                                        | Coating Express, 2014; Zhu, 1982; Yang, 2004; Timetric, 2011; Liu, 2007; Zhuang, 1996; Guo, 1999; Bo, 2012                                                                                                                                                                        |
| Other countries (Australia, New<br>Zealand, Saudi Arabia, United Arab<br>Emirates, Qatar, Bahrain, Turkey,<br>Iran)                                           | IFSC, 1972; Timetric, 2011; Liu, 2007; Sun, 1998, 1999; Bo, 2012                                                                                                                                                                                                                  |
| World                                                                                                                                                         | Morikis, 2019; Qu, 2000; von Dungen and Maier, 2015; CBC, 2017; Liu, 2018; Zhong, 2019; Growney, 2018; ICI Paints, 1989; Shi, 1984; Timetric, 2011; Gagro, 2021, 2018; Liu, 1984; Oullette, 2004; Menukhin, 2018, 2020; Liu, 2007; Zheng, 1996; Zhuang, 1996; Guo, 1999; Bo, 2012 |

**Table S10.** Region and income groups of countries/territories used in the mixed effects models (World Bank, 2022).

| Country/territory   | Region group 1               | Region group 2      | Income group        |
|---------------------|------------------------------|---------------------|---------------------|
| Afghanistan         | Central and Western Asia     | Other Asia          | Low income          |
| Albania             | Eastern Europe               | Europe              | Upper middle income |
| Algeria             | Middle East and North Africa | Africa              | Lower middle income |
| American Samoa      | Oceania and Pacific          | Oceania and Pacific | Upper middle income |
| Angola              | Sub-Saharan Africa           | Africa              | Lower middle income |
| Anguilla            | Latin America                | Latin America       | High income         |
| Antigua and Barbuda | Latin America                | Latin America       | High income         |
| Argentina           | Latin America                | Latin America       | Upper middle income |
| Armenia             | Central and Western Asia     | Other Asia          | Upper middle income |
| Aruba               | Latin America                | Latin America       | High income         |
| Australia           | Oceania and Pacific          | Oceania and Pacific | High income         |
| Austria             | Western Europe               | Europe              | High income         |
| Azerbaijan          | Central and Western Asia     | Other Asia          | Upper middle income |
| Bahamas             | Latin America                | Latin America       | High income         |
| Bahrain             | Middle East and North Africa | Other Asia          | High income         |
| Bangladesh          | South and Southeast Asia     | Other Asia          | Lower middle income |
| Barbados            | Latin America                | Latin America       | High income         |
| Belarus             | Eastern Europe               | Europe              | Upper middle income |
| Belgium             | Western Europe               | Europe              | High income         |
| Belize              | Latin America                | Latin America       | Lower middle income |
| Benin               | Sub-Saharan Africa           | Africa              | Lower middle income |
| Bermuda             | Latin America                | Latin America       | High income         |

|                                                |                          |                     |                     |
|------------------------------------------------|--------------------------|---------------------|---------------------|
| Bhutan                                         | South and Southeast Asia | Other Asia          | Lower middle income |
| Bolivia                                        | Latin America            | Latin America       | Lower middle income |
| Bonaire, Sint Eustatius and Saba               | Latin America            | Latin America       | High income         |
| Bosnia and Herzegovina                         | Eastern Europe           | Europe              | Upper middle income |
| Botswana                                       | Sub-Saharan Africa       | Africa              | Upper middle income |
| Brazil                                         | Latin America            | Latin America       | Upper middle income |
| Brunei Darussalam                              | South and Southeast Asia | Other Asia          | High income         |
| Bulgaria                                       | Eastern Europe           | Europe              | Upper middle income |
| Burkina Faso                                   | Sub-Saharan Africa       | Africa              | Low income          |
| Burundi                                        | Sub-Saharan Africa       | Africa              | Low income          |
| Cape Verde                                     | Sub-Saharan Africa       | Africa              | Lower middle income |
| Cambodia                                       | South and Southeast Asia | Other Asia          | Lower middle income |
| Cameroon                                       | Sub-Saharan Africa       | Africa              | Lower middle income |
| Canada                                         | Canada                   | Canada and USA      | High income         |
| Cayman Islands                                 | Latin America            | Latin America       | High income         |
| Central African Republic                       | Sub-Saharan Africa       | Africa              | Low income          |
| Chad                                           | Sub-Saharan Africa       | Africa              | Low income          |
| Chile                                          | Latin America            | Latin America       | High income         |
| China (including Hong Kong, Macao, and Taiwan) | China                    | China               | Upper middle income |
| Colombia                                       | Latin America            | Latin America       | Upper middle income |
| Comoros                                        | Sub-Saharan Africa       | Africa              | Lower middle income |
| Democratic Republic of Congo                   | Sub-Saharan Africa       | Africa              | Low income          |
| Congo                                          | Sub-Saharan Africa       | Africa              | Lower middle income |
| Cook Islands                                   | Oceania and Pacific      | Oceania and Pacific | High income         |

|                    |                              |                     |                     |
|--------------------|------------------------------|---------------------|---------------------|
| Costa Rica         | Latin America                | Latin America       | Upper middle income |
| Croatia            | Eastern Europe               | Europe              | High income         |
| Cuba               | Latin America                | Latin America       | Upper middle income |
| Curacao            | Latin America                | Latin America       | High income         |
| Cyprus             | Eastern Europe               | Europe              | High income         |
| Czech Republic     | Eastern Europe               | Europe              | High income         |
| Côte d'Ivoire      | Sub-Saharan Africa           | Africa              | Lower middle income |
| Denmark            | Western Europe               | Europe              | High income         |
| Djibouti           | Sub-Saharan Africa           | Africa              | Lower middle income |
| Dominica           | Latin America                | Latin America       | Upper middle income |
| Dominican Republic | Latin America                | Latin America       | Upper middle income |
| Ecuador            | Latin America                | Latin America       | Upper middle income |
| Egypt              | Middle East and North Africa | Africa              | Lower middle income |
| El Salvador        | Latin America                | Latin America       | Lower middle income |
| Equatorial Guinea  | Sub-Saharan Africa           | Africa              | Upper middle income |
| Eritrea            | Sub-Saharan Africa           | Africa              | Low income          |
| Estonia            | Eastern Europe               | Europe              | High income         |
| Swaziland          | Sub-Saharan Africa           | Africa              | Lower middle income |
| Ethiopia           | Sub-Saharan Africa           | Africa              | Low income          |
| Falkland Islands   | Latin America                | Latin America       | High income         |
| Faeroe Islands     | Western Europe               | Europe              | High income         |
| Fiji               | Oceania and Pacific          | Oceania and Pacific | Upper middle income |
| Finland            | Western Europe               | Europe              | High income         |
| France             | Western Europe               | Europe              | High income         |

|                          |                              |                     |                     |
|--------------------------|------------------------------|---------------------|---------------------|
| French Guiana            | Latin America                | Latin America       | High income         |
| French Polynesia         | Oceania and Pacific          | Oceania and Pacific | High income         |
| Gabon                    | Sub-Saharan Africa           | Africa              | Upper middle income |
| Gambia                   | Sub-Saharan Africa           | Africa              | Low income          |
| Georgia                  | Central and Western Asia     | Other Asia          | Upper middle income |
| Germany                  | Western Europe               | Europe              | High income         |
| Ghana                    | Sub-Saharan Africa           | Africa              | Lower middle income |
| Gibraltar                | Western Europe               | Europe              | High income         |
| Greece                   | Western Europe               | Europe              | High income         |
| Greenland                | Western Europe               | Europe              | High income         |
| Grenada                  | Latin America                | Latin America       | Upper middle income |
| Guadeloupe               | Latin America                | Latin America       | High income         |
| Guam                     | Oceania and Pacific          | Oceania and Pacific | High income         |
| Guatemala                | Latin America                | Latin America       | Upper middle income |
| Guinea                   | Sub-Saharan Africa           | Africa              | Low income          |
| Guinea-Bissau            | Sub-Saharan Africa           | Africa              | Low income          |
| Guyana                   | Latin America                | Latin America       | Upper middle income |
| Haiti                    | Latin America                | Latin America       | Lower middle income |
| Honduras                 | Latin America                | Latin America       | Lower middle income |
| Hungary                  | Eastern Europe               | Europe              | High income         |
| Iceland                  | Western Europe               | Europe              | High income         |
| India                    | India                        | India               | Lower middle income |
| Indonesia                | South and Southeast Asia     | Other Asia          | Lower middle income |
| Islamic Republic of Iran | Middle East and North Africa | Other Asia          | Lower middle income |

|                                       |                              |                     |                     |
|---------------------------------------|------------------------------|---------------------|---------------------|
| Iraq                                  | Middle East and North Africa | Other Asia          | Upper middle income |
| Ireland                               | Western Europe               | Europe              | High income         |
| Isle of Man                           | Western Europe               | Europe              | High income         |
| Israel                                | Middle East and North Africa | Other Asia          | High income         |
| Italy                                 | Western Europe               | Europe              | High income         |
| Jamaica                               | Latin America                | Latin America       | Upper middle income |
| Japan                                 | East Asia                    | Other Asia          | High income         |
| Jersey                                | Western Europe               | Europe              | High income         |
| Jordan                                | Middle East and North Africa | Other Asia          | Upper middle income |
| Kazakhstan                            | Central and Western Asia     | Other Asia          | Upper middle income |
| Kenya                                 | Sub-Saharan Africa           | Africa              | Lower middle income |
| Kiribati                              | Oceania and Pacific          | Oceania and Pacific | Lower middle income |
| Democratic People's Republic of Korea | East Asia                    | Other Asia          | Low income          |
| Republic of Korea                     | East Asia                    | Other Asia          | High income         |
| Kuwait                                | Middle East and North Africa | Other Asia          | High income         |
| Kyrgyzstan                            | Central and Western Asia     | Other Asia          | Lower middle income |
| Laos                                  | South and Southeast Asia     | Other Asia          | Lower middle income |
| Latvia                                | Eastern Europe               | Europe              | High income         |
| Lebanon                               | Middle East and North Africa | Other Asia          | Upper middle income |
| Lesotho                               | Sub-Saharan Africa           | Africa              | Lower middle income |
| Liberia                               | Sub-Saharan Africa           | Africa              | Low income          |
| Libya                                 | Middle East and North Africa | Africa              | Upper middle income |
| Liechtenstein                         | Western Europe               | Europe              | High income         |
| Lithuania                             | Eastern Europe               | Europe              | High income         |

|                                |                              |                     |                     |
|--------------------------------|------------------------------|---------------------|---------------------|
| Luxembourg                     | Western Europe               | Europe              | High income         |
| Madagascar                     | Sub-Saharan Africa           | Africa              | Low income          |
| Malawi                         | Sub-Saharan Africa           | Africa              | Low income          |
| Malaysia                       | South and Southeast Asia     | Other Asia          | Upper middle income |
| Maldives                       | South and Southeast Asia     | Other Asia          | Upper middle income |
| Mali                           | Sub-Saharan Africa           | Africa              | Low income          |
| Malta                          | Western Europe               | Europe              | High income         |
| Marshall Islands               | Oceania and Pacific          | Oceania and Pacific | Upper middle income |
| Martinique                     | Latin America                | Latin America       | High income         |
| Mauritania                     | Sub-Saharan Africa           | Africa              | Lower middle income |
| Mauritius                      | Sub-Saharan Africa           | Africa              | Upper middle income |
| Mayotte                        | Sub-Saharan Africa           | Africa              | Upper middle income |
| Mexico                         | Latin America                | Latin America       | Upper middle income |
| Federated States of Micronesia | Oceania and Pacific          | Oceania and Pacific | Lower middle income |
| Moldova                        | Eastern Europe               | Europe              | Upper middle income |
| Mongolia                       | Central and Western Asia     | Other Asia          | Lower middle income |
| Montenegro                     | Eastern Europe               | Europe              | Upper middle income |
| Montserrat                     | Latin America                | Latin America       | Upper middle income |
| Morocco                        | Middle East and North Africa | Africa              | Lower middle income |
| Mozambique                     | Sub-Saharan Africa           | Africa              | Low income          |
| Myanmar                        | South and Southeast Asia     | Other Asia          | Lower middle income |
| Namibia                        | Sub-Saharan Africa           | Africa              | Upper middle income |
| Nauru                          | Oceania and Pacific          | Oceania and Pacific | High income         |
| Nepal                          | South and Southeast Asia     | Other Asia          | Lower middle income |

|                          |                              |                     |                     |
|--------------------------|------------------------------|---------------------|---------------------|
| Netherlands              | Western Europe               | Europe              | High income         |
| New Caledonia            | Oceania and Pacific          | Oceania and Pacific | High income         |
| New Zealand              | Oceania and Pacific          | Oceania and Pacific | High income         |
| Nicaragua                | Latin America                | Latin America       | Lower middle income |
| Niger                    | Sub-Saharan Africa           | Africa              | Low income          |
| Nigeria                  | Sub-Saharan Africa           | Africa              | Lower middle income |
| Niue                     | Oceania and Pacific          | Oceania and Pacific | Upper middle income |
| Norfolk Island           | Oceania and Pacific          | Oceania and Pacific | High income         |
| North Macedonia          | Eastern Europe               | Europe              | Upper middle income |
| Northern Mariana Islands | Oceania and Pacific          | Oceania and Pacific | High income         |
| Norway                   | Western Europe               | Europe              | High income         |
| Oman                     | Middle East and North Africa | Other Asia          | High income         |
| Pakistan                 | South and Southeast Asia     | Other Asia          | Lower middle income |
| Palau                    | Oceania and Pacific          | Oceania and Pacific | High income         |
| Palestine                | Middle East and North Africa | Other Asia          | Lower middle income |
| Panama                   | Latin America                | Latin America       | Upper middle income |
| Papua New Guinea         | Oceania and Pacific          | Oceania and Pacific | Lower middle income |
| Paraguay                 | Latin America                | Latin America       | Upper middle income |
| Peru                     | Latin America                | Latin America       | Upper middle income |
| Philippines              | South and Southeast Asia     | Other Asia          | Lower middle income |
| Pitcairn                 | Oceania and Pacific          | Oceania and Pacific | Lower middle income |
| Poland                   | Eastern Europe               | Europe              | High income         |
| Portugal                 | Western Europe               | Europe              | High income         |
| Puerto Rico              | Latin America                | Latin America       | High income         |



|                              |                              |                     |                     |
|------------------------------|------------------------------|---------------------|---------------------|
| Qatar                        | Middle East and North Africa | Other Asia          | High income         |
| Romania                      | Eastern Europe               | Europe              | Upper middle income |
| Russia                       | Russia                       | Russia              | Upper middle income |
| Rwanda                       | Sub-Saharan Africa           | Africa              | Low income          |
| Reunion                      | Sub-Saharan Africa           | Africa              | High income         |
| Saint Helena                 | Sub-Saharan Africa           | Africa              | Upper middle income |
| Saint Kitts and Nevis        | Latin America                | Latin America       | High income         |
| Saint Lucia                  | Latin America                | Latin America       | Upper middle income |
| Saint Pierre and Miquelon    | Latin America                | Latin America       | High income         |
| Saint Vincent and Grenadines | Latin America                | Latin America       | Upper middle income |
| Samoa                        | Oceania and Pacific          | Oceania and Pacific | Lower middle income |
| Sao Tome and Principe        | Sub-Saharan Africa           | Africa              | Lower middle income |
| Saudi Arabia                 | Middle East and North Africa | Other Asia          | High income         |
| Senegal                      | Sub-Saharan Africa           | Africa              | Lower middle income |
| Serbia                       | Eastern Europe               | Europe              | Upper middle income |
| Seychelles                   | Sub-Saharan Africa           | Africa              | High income         |
| Sierra Leone                 | Sub-Saharan Africa           | Africa              | Low income          |
| Singapore                    | South and Southeast Asia     | Other Asia          | High income         |
| Sint Maarten                 | Latin America                | Latin America       | High income         |
| Slovakia                     | Eastern Europe               | Europe              | High income         |
| Slovenia                     | Eastern Europe               | Europe              | High income         |
| Solomon Islands              | Oceania and Pacific          | Oceania and Pacific | Lower middle income |
| Somalia                      | Sub-Saharan Africa           | Africa              | Low income          |
| South Africa                 | Sub-Saharan Africa           | Africa              | Upper middle income |

|                          |                              |                     |                     |
|--------------------------|------------------------------|---------------------|---------------------|
| South Sudan              | Sub-Saharan Africa           | Africa              | Low income          |
| Spain                    | Western Europe               | Europe              | High income         |
| Sri Lanka                | South and Southeast Asia     | Other Asia          | Lower middle income |
| Sudan                    | Middle East and North Africa | Africa              | Low income          |
| Suriname                 | Latin America                | Latin America       | Upper middle income |
| Sweden                   | Western Europe               | Europe              | High income         |
| Switzerland              | Western Europe               | Europe              | High income         |
| Syria                    | Middle East and North Africa | Other Asia          | Low income          |
| Tajikistan               | Central and Western Asia     | Other Asia          | Lower middle income |
| Tanzania                 | Sub-Saharan Africa           | Africa              | Lower middle income |
| Thailand                 | South and Southeast Asia     | Other Asia          | Upper middle income |
| Timor-Leste              | South and Southeast Asia     | Other Asia          | Lower middle income |
| Togo                     | Sub-Saharan Africa           | Africa              | Low income          |
| Tokelau                  | Oceania and Pacific          | Oceania and Pacific | Upper middle income |
| Tonga                    | Oceania and Pacific          | Oceania and Pacific | Upper middle income |
| Trinidad and Tobago      | Latin America                | Latin America       | High income         |
| Tunisia                  | Middle East and North Africa | Africa              | Lower middle income |
| Turkey                   | Middle East and North Africa | Europe              | Upper middle income |
| Turkmenistan             | Central and Western Asia     | Other Asia          | Upper middle income |
| Turks and Caicos Islands | Latin America                | Latin America       | High income         |
| Tuvalu                   | Oceania and Pacific          | Oceania and Pacific | Upper middle income |
| Uganda                   | Sub-Saharan Africa           | Africa              | Low income          |
| Ukraine                  | Eastern Europe               | Europe              | Lower middle income |
| United Arab Emirates     | Middle East and North Africa | Other Asia          | High income         |

|                              |                              |                     |                     |
|------------------------------|------------------------------|---------------------|---------------------|
| United Kingdom               | Western Europe               | Europe              | High income         |
| United States                | United States                | Canada and USA      | High income         |
| Uruguay                      | Latin America                | Latin America       | High income         |
| Uzbekistan                   | Central and Western Asia     | Other Asia          | Lower middle income |
| Vanuatu                      | Oceania and Pacific          | Oceania and Pacific | Lower middle income |
| Venezuela                    | Latin America                | Latin America       | Lower middle income |
| Vietnam                      | South and Southeast Asia     | Other Asia          | Lower middle income |
| British Virgin Islands       | Latin America                | Latin America       | High income         |
| United States Virgin Islands | Latin America                | Latin America       | High income         |
| Wallis and Futuna Islands    | Oceania and Pacific          | Oceania and Pacific | High income         |
| Western Sahara               | Middle East and North Africa | Africa              | Lower middle income |
| Yemen                        | Middle East and North Africa | Other Asia          | Low income          |
| Zambia                       | Sub-Saharan Africa           | Africa              | Lower middle income |
| Zimbabwe                     | Sub-Saharan Africa           | Africa              | Lower middle income |

**Table S11.** Data sources of compiled regional data for paint application purposes and waterborne paint proportions.

| <b>Region</b>             | <b>Major data sources</b>                                                                                         |
|---------------------------|-------------------------------------------------------------------------------------------------------------------|
| China                     | Wei et al. 2008; Li et al., 2017; Li et al., 2019; Zhiyan Consulting, 2017                                        |
| United States and Canada  | Combustion Department, 1970; Zhao et al., 1998; Greiner and Veleva, 2004; American Coatings Association, 2022     |
| Western Europe            | Combustion Department, 1970; Wang, 1989; Zhou, 1997; Harries et al., 2002; Gagro, 2021; Broekhuizen et al., 2000; |
| Eastern Europe and Russia | Combustion Department, 1970; Fang, 1983; Xu, 2002; IRL, 2012; KDM International Ltd, 2019                         |
| Japan                     | Combustion Department, 1970; Sun, 1998; Timetric, 2011, Menukhin, 2020                                            |
| India                     | Zhou, 1998; Devaraj et al., 2007; Timetric, 2011; Mordor Intelligence, 2021                                       |
| Other Asia                | Refer to Japan or India                                                                                           |
| Latin America             | Zhu, 1982; Zhou, 1997; Timetric, 2011; Rácz and Yamaga, 2017                                                      |
| Middle East and Africa    | Galbraith, 2005; IRL, 2015; Pollard et al., 2018                                                                  |
| Other region              | Zhou, 1997, 2000; Timetric, 2011                                                                                  |

**Table S12.** The probability distributions of emission parameters (Bond et al., 2004; Lu et al., 2011; Zhao et al., 2011; Tong et al., 2018; EEA, 2023).

| 1 <sup>st</sup> level                       | 2 <sup>nd</sup> level                                 | Activity rate                  | Technology distribution | Emission factor | Penetration ratios of control technology |
|---------------------------------------------|-------------------------------------------------------|--------------------------------|-------------------------|-----------------|------------------------------------------|
| Power generation                            | Coal                                                  |                                |                         |                 |                                          |
| Heat (auto producer)                        | (Anthracite, Coking                                   |                                |                         |                 |                                          |
| Heat (public)                               | coal, Other                                           | Normal                         |                         |                 |                                          |
| Coal mines                                  | bituminous coal,                                      | Fossil fuel: 1970-             |                         |                 |                                          |
| Oil and gas extraction                      | Sub-bituminous                                        | 1999 OECD                      |                         |                 |                                          |
| Blast furnaces                              | coal, Lignite, Patent                                 | countries                      |                         |                 |                                          |
| Gas works                                   | fuel, Coke oven                                       | CV=15%; non-                   |                         |                 |                                          |
| Gasification plants for biogases            | coke, Gas coke, Coal tar, BKB, Gas works              | OECD countries with local data |                         |                 |                                          |
| Coke ovens                                  | gas, Coke oven gas,                                   | fusion CV=20%;                 |                         |                 |                                          |
| Patent fuel plants                          | Blast furnace gas,                                    | other countries                |                         |                 |                                          |
| BKB/peat briquette plants                   | Other recovered gases, Peat, Peat                     | CV=25%                         |                         |                 |                                          |
| Oil refineries                              | products)                                             | 2000-2020                      |                         |                 |                                          |
| Coal liquefaction plants                    |                                                       | OECD countries                 |                         |                 |                                          |
| Liquefaction (LNG) / regasification plants  | Oil                                                   | CV=10%; non-                   |                         |                 |                                          |
| Gas-to-liquids (GTL) plants                 | (Crude oil, Natural gas liquids, Refinery feedstocks, | OECD countries with local data |                         |                 |                                          |
| Own use in electricity, CHP and heat plants | Additives/blending components, Other                  | fusion CV=15%;                 |                         |                 |                                          |
| Charcoal production plants                  | hydrocarbons, Refinery gas,                           | other countries                |                         |                 |                                          |
| Non-specified transformation industries     | Ethane, Liquefied petroleum gases (LPG), Motor        | CV=20%';                       | None                    | Lognormal       | None                                     |
| Iron and steel                              | gasoline excluding biofuels, Aviation                 | Biomass: 1970-                 |                         | CV=10%          |                                          |
| Non-ferrous metals                          | gasoline, Gasoline                                    | 1999 OECD                      |                         |                 |                                          |
| Chemicals                                   | type jet fuel,                                        | countries                      |                         |                 |                                          |
| Pulp and paper                              | Kerosene type jet                                     | CV=40%; non-                   |                         |                 |                                          |
| Food and tobacco                            | fuel excluding                                        | OECD countries                 |                         |                 |                                          |
| Cement                                      | biofuels, Other                                       | with local data                |                         |                 |                                          |
| Other non-metallic minerals                 | kerosene, Gas/diesel                                  | fusion CV=45%;                 |                         |                 |                                          |
| Transport equipment                         | oil excluding                                         | other countries                |                         |                 |                                          |
| Machinery                                   | biofuels, Fuel oil,                                   | CV=50%                         |                         |                 |                                          |
| Mining and quarrying                        | Naphtha, White                                        | 2000-2020                      |                         |                 |                                          |
| Wood products                               | spirit and SBP,                                       | OECD countries                 |                         |                 |                                          |
|                                             |                                                       | CV=30%; non-                   |                         |                 |                                          |
|                                             |                                                       | OECD countries                 |                         |                 |                                          |
|                                             |                                                       | with local data                |                         |                 |                                          |
|                                             |                                                       | fusion CV=35%;                 |                         |                 |                                          |
|                                             |                                                       | other countries                |                         |                 |                                          |
|                                             |                                                       | CV=40%                         |                         |                 |                                          |

|                                  |                                       |                                                |              |         |
|----------------------------------|---------------------------------------|------------------------------------------------|--------------|---------|
| Construction                     | Lubricants, Bitumen,                  |                                                |              |         |
| Textile and leather              | Paraffin waxes,                       |                                                |              |         |
| Other non-specified industries   | Petroleum coke, Other oil products,   |                                                |              |         |
| International aviation           | Oil shale and oil                     |                                                |              |         |
| Domestic aviation                | sands)                                |                                                |              |         |
| Rail                             |                                       |                                                |              |         |
| International navigation         | Natural gas (Natural gas)             |                                                |              |         |
| Domestic navigation              |                                       |                                                | Lognormal    |         |
| Pipeline transport               | Biomass                               | None                                           | CV=15%       | None    |
| Other non-specified transport    | (Renewable municipal waste,           |                                                |              |         |
| Agriculture and forestry         | Primary solid biofuels, Biogases,     |                                                |              |         |
| Fishing                          | Bio gasoline,                         |                                                |              |         |
| Cars                             | Biodiesels, Bio jet                   |                                                |              |         |
| Light duty trucks                | kerosene, Other                       |                                                |              |         |
| Buses                            | liquid biofuels, Non-                 | Uniform                                        |              |         |
| Heavy duty trucks                | specified primary                     | ±30%                                           | Lognormal    | None    |
| Motorcycles                      | biofuels/waste,                       |                                                | CV=10%       |         |
| Other fleet totals               | Charcoal)                             | None                                           |              |         |
| Commercial and institutional     |                                       |                                                |              |         |
| Residential (rural)              |                                       | Uniform                                        | Lognormal    |         |
| Residential (urban)              |                                       | ±30%                                           | CV=20%       | None    |
| Non-specified sectors            |                                       | None                                           |              |         |
| Fugitive (solid fuel production) | Coke oven coke production             | Normal 1970-1999                               | Uniform ±90% | None    |
|                                  | Oil production                        | OECD countries                                 |              |         |
|                                  | Oil storage and transport             | CV=15%; non-OECD countries                     |              |         |
|                                  | Oil refining                          | with local data                                |              |         |
|                                  | Gasoline storage                      | fusion CV=20%;                                 |              |         |
|                                  | Gasoline distribution                 | other countries                                | None         |         |
| Fugitive (oil and gas)           | Diesel storage                        | CV=25%                                         | Uniform      | Uniform |
|                                  | Venting and flaring                   | 2000-2020                                      | ±90%         | ±30%    |
|                                  | Flaring in oil refinery               | OECD countries                                 |              |         |
|                                  | Natural gas production,               | CV=10%; non-OECD countries                     |              |         |
|                                  | processing, storage, and distribution | with local data fusion CV=15%; other countries |              |         |

|                                      |                                  |                     |      |                 |
|--------------------------------------|----------------------------------|---------------------|------|-----------------|
|                                      | Gas venting and flaring          | CV=20%              |      |                 |
| Mineral industry                     | Cement production                |                     |      |                 |
|                                      | Clicker production               |                     | None | Uniform<br>±80% |
|                                      | Glass production                 |                     |      | None            |
| Chemical industry<br>(inorganic)     | Ammonia                          |                     | None |                 |
|                                      | Carbon black                     |                     |      |                 |
|                                      | Adipic acid                      |                     |      |                 |
|                                      | Ethylene                         |                     |      |                 |
|                                      | Vinyl chloride                   |                     |      |                 |
|                                      | Styrene                          |                     |      |                 |
|                                      | Low density polyethylene (LDPE)  |                     |      |                 |
|                                      | High density polyethylene (HDPE) | Normal              |      |                 |
|                                      | Polyvinyl chloride (PVC)         | 1970-1999           | None |                 |
|                                      | Polypropylene (PP)               | Developed countries |      |                 |
| Chemical industry<br>(organic)       | Polystyrene (PS)                 | CV=15% Other        |      |                 |
|                                      | SAN & ABS resins                 | countries           |      |                 |
|                                      | Other synthetic resins           | CV=20%<br>2000-2020 |      | Uniform<br>±95% |
|                                      | Ethylene oxide                   | Developed           |      | Uniform<br>±30% |
|                                      | Methanol                         | countries           |      |                 |
|                                      | Acrylonitrile                    | CV=10% Other        |      |                 |
|                                      | Glyoxylic acid                   | countries           |      |                 |
|                                      | Synthetic rubber                 | CV=15%              |      |                 |
|                                      | Tyre production                  |                     |      |                 |
|                                      | Pharmaceutical production        |                     |      |                 |
| Chemical industry<br>(manufacturing) | Asphalt                          |                     |      |                 |
|                                      | Paint production                 |                     |      |                 |
|                                      | Printing ink production          |                     | None |                 |
|                                      | Glues production                 |                     |      |                 |
|                                      | Shoes production                 |                     |      |                 |
|                                      | Leather tanning                  |                     |      |                 |
|                                      | Synthetic fibre                  |                     |      |                 |
|                                      | Wool                             |                     |      |                 |
|                                      | Silk                             |                     |      |                 |
|                                      | Cloth                            |                     |      |                 |

|                                |                             |                        |         |         |
|--------------------------------|-----------------------------|------------------------|---------|---------|
|                                | Artificial fibre            |                        |         |         |
| Metal industry                 | Sinter production           |                        |         |         |
|                                | Pellet production           |                        |         |         |
|                                | Pig iron production         |                        | None    |         |
|                                | DRI production              |                        | Uniform | None    |
|                                |                             |                        | ±60%    |         |
|                                | Steel production            |                        | Uniform |         |
|                                |                             |                        | ±30%    |         |
| Pulp, paper, and food industry | Paper pulp                  |                        |         |         |
|                                | Paper                       |                        |         |         |
|                                | Plywood                     |                        |         |         |
|                                | Bread                       |                        |         |         |
|                                | Biscuit                     |                        |         |         |
|                                | Sugar                       |                        | None    | Uniform |
|                                | Flour                       |                        |         | ±30%    |
|                                | Oilseed                     |                        |         |         |
|                                | Beer                        |                        |         |         |
|                                | Wine                        |                        |         |         |
|                                | Spirit                      |                        |         |         |
| Paint use                      | Architectural interior wall |                        |         |         |
|                                | Architecture other          |                        |         |         |
|                                | Vehicle manufacturing       | Normal                 | Uniform | Uniform |
|                                | Vehicle repairing           | 1970-1999              | ±30%    | ±30%    |
|                                | Wood                        | Developed countries    |         |         |
|                                | Other industrial paint      | CV=25% Other countries |         |         |
| Other industrial use           | Vehicle dewax               |                        |         |         |
|                                | Vehicle reseal              | CV=30%                 |         | Uniform |
|                                | Printing ink use            | 2000-2020              |         | ±95%    |
|                                | Glues and adhesives use     | Developed countries    |         |         |
|                                | Preservation of wood        | CV=15% Other countries | None    | Uniform |
|                                | Degreasing                  | CV=20%                 |         | ±30%    |
|                                | Dry cleaning                |                        |         |         |
| Domestic use                   | Domestic use                |                        |         | Uniform |
|                                | Pesticide                   |                        | None    | ±30%    |



## References

- American Coatings Association. (2022). Nine Years Following the Great Recession: The State of the U.S. Paint and Coatings Industry. <https://www.paint.org/coatingstech-magazine/articles/nine-years-following-great-recession-state-u-s-paint-coatings-industry/>
- Behm, R. & Schlachta, R. (2019). Case study – Shoe manufacture. [https://tftei.citepa.org/images/files/2019-11-11-12/10d\\_BAT%20Shoe%20Manufacturing.pdf](https://tftei.citepa.org/images/files/2019-11-11-12/10d_BAT%20Shoe%20Manufacturing.pdf)
- Bo, W. (2012). Synthetic Rubber Production in Major Countries and Regions Worldwide (in Chinese). China Rubber Industry, 28(13), 34.
- Bo, Y., Cai, H., & Xie, S. D. (2008). Spatial and temporal variation of historical anthropogenic NMVOCs emission inventories in China. Atmospheric Chemistry and Physics, 8(23), 7297-7316.
- Bond, T. C., Streets, D. G., Yarber, K. F., Nelson, S. M., Woo, J. H., & Klimont, Z. (2004). A technology-based global inventory of black and organic carbon emissions from combustion. Journal of Geophysical Research: Atmospheres, 109, D14203.
- Brussels Instituut voor Milieubeheer. (2010). NMVOC emissions through domestic solvent use and the use of paints in the Brussels Capital Region. [https://document.environnement.brussels/opac\\_css/elecfile/STUD\\_2010\\_NMVOC](https://document.environnement.brussels/opac_css/elecfile/STUD_2010_NMVOC)
- Chen, C., Xu, R., Tong, D., Qin, X., Cheng, J., Liu, J., ... & Zhang, Q. (2022). A striking growth of CO<sub>2</sub> emissions from the global cement industry driven by new facilities in emerging countries. Environmental Research Letters, 17(4), 044007.
- Chew, R., Smith, G. T., & Wells, N. (1985). Pharmaceuticals in seven nations. <https://ideas.repec.org/p/ohe/monogr/000652.html>
- China Bluestar Chengrand (CBC) Co., Ltd. (2017). Progress of the world's plastics industry in 2015-2016 (in Chinese). China Plastics Industry, 2017(3).
- Coating Express. (2014). The South American coatings market is expected to reach 3.8 million tons in 2018 (in Chinese). Coatings Technology & Abstracts, 35(6), 53.
- Combustion Department. (1970). Production level and development trend of coatings industry in six countries including the United States, the Soviet Union, West Germany, Japan, the United Kingdom, and France (in Chinese). Paint Industry, 5, 1-40.
- Croll, S. (2009). History of Paint Science and Technology. <https://www.ndsu.edu/fileadmin/croll/HistoryofPaintSGC.pdf>
- Davis, N., Lents, J., Osses, M., Nikkila, N., & Barth, M. (2005). Development and application of an international vehicle emissions model. Transportation Research Record, 1939(1), 156-165.
- Devaraj, P. (2007). The Indian Paint Industry. [https://www.coatingsworld.com/issues/2007-10/view\\_features/the-indian-paint-industry/](https://www.coatingsworld.com/issues/2007-10/view_features/the-indian-paint-industry/)
- European Bureau for Research on Industrial Transformation and Emissions (EU-BRITE). (2006). Reference Document on Best Available Techniques for the Manufacture of Organic Fine Chemicals. <https://eippcb.jrc.ec.europa.eu/reference/manufacture-organic-fine-chemicals>

- European Bureau for Research on Industrial Transformation and Emissions (EU-BRITE). (2007a). Reference Document on Best Available Techniques for the Manufacture of Large Volume Inorganic Chemicals – Ammonia, Acids and Fertilisers. <https://eippcb.jrc.ec.europa.eu/reference/large-volume-inorganic-chemicals-ammonia-acids-and-fertilisers>
- European Bureau for Research on Industrial Transformation and Emissions (EU-BRITE). (2007b). Reference Document on Best Available Techniques for the Manufacture of Large Volume Inorganic Chemicals – Solids and Others Industry. <https://eippcb.jrc.ec.europa.eu/reference/large-volume-inorganic-chemicals-solids-and-others-industry>
- European Bureau for Research on Industrial Transformation and Emissions (EU-BRITE). (2007c). Reference Document on Best Available Techniques for the Production of Polymers. <https://eippcb.jrc.ec.europa.eu/reference/production-polymers>
- European Bureau for Research on Industrial Transformation and Emissions (EU-BRITE). (2015). Reference Document on Best Available Techniques for the Production of Pulp, Paper and Board. <https://eippcb.jrc.ec.europa.eu/reference/production-pulp-paper-and-board>
- European Bureau for Research on Industrial Transformation and Emissions (EU-BRITE). (2017). Reference Document on Best Available Techniques for the Production of Large Volume Organic Chemicals. <https://eippcb.jrc.ec.europa.eu/reference/production-large-volume-organic-chemicals-0>
- European Bureau for Research on Industrial Transformation and Emissions (EU-BRITE). (2019). Reference Document on Best Available Techniques for the Food, Drink and Milk Industries. <https://eippcb.jrc.ec.europa.eu/reference/food-drink-and-milk-industries>
- European Environmental Agency (EEA). (2019). EMEP/EEA air pollutant emission inventory guidebook 2019. <https://www.eea.europa.eu/publications/emep-eea-guidebook-2019>
- European Environmental Agency (EEA). (2022). Heating Degree Days. <https://www.eea.europa.eu/data-and-maps/figures/heating-degree-days>
- European Environmental Agency (EEA). (2023). EMEP/EEA air pollutant emission inventory guidebook 2023. <https://www.eea.europa.eu/publications/emep-eea-guidebook-2023>
- Fang, M. (1983). Overview of the Development of the Coatings Industry in the Soviet Union (in Chinese). Paint Industry, 6, 34-39
- Food and Agriculture Organization (FAO). (2022). FAOSTAT. <https://www.fao.org/faostat/en/#data>
- French National Emission Inventory Agency. (2021). Organisation et méthodes des inventaires nationaux des émissions atmosphériques. [https://www.citepa.org/wp-content/uploads/publications/omineae/Citepa\\_Om-inea\\_ed2021.pdf](https://www.citepa.org/wp-content/uploads/publications/omineae/Citepa_Om-inea_ed2021.pdf)
- Gagro, D. (2018). The Global Paint and Coatings Industry (in Chinese). China Coatings, 33(12), 58-62.
- Gagro, D. (2021). Architectural Paints and Coatings Market: On the Upswing (in Chinese). China Coatings, 36(06), 74-76.

- Galbraith, C. (2005). A profile of the Middle Eastern and African Paint Industry. *Pigment & Resin Technology*, 34(1).
- Gelaro, R., McCarty, W., Suárez, M. J., Todling, R., Molod, A., Takacs, L., ... & Zhao, B. (2017). The modern-era retrospective analysis for research and applications, version 2 (MERRA-2). *Journal of Climate*, 30(14), 5419-5454.
- Gong, P., Liu, H., Zhang, M., Li, C., Wang, J., Huang, H., ... & Song, L. (2019). Stable classification with limited sample: Transferring a 30-m resolution sample set collected in 2015 to mapping 10-m resolution global land cover in 2017. *Science Bulletin*, 64(6), 370-373.
- Greiner, T. & Veleva, V. (2004). A Background Report for the National Dialogue on Paint Product Stewardship. <https://www.scribd.com/document/549298860/Background-Report-for-the-National-Dialogue-on-Paint>
- Growney, M. (2018). Overview of the Global Coatings and Ink Additives Market in 2017 (in Chinese). *China Coatings*, 33(08), 74-75.
- Guo, F. (1999). Overview of Global Raw Silk Production and Silk Products Market (2) (in Chinese). *Marketing Research*, 20(7), 9-13.
- Gurney, K. R., Huang, J., & Coltin, K. (2016). Bias present in US federal agency power plant CO<sub>2</sub> emissions data and implications for the US clean power plan. *Environmental Research Letters*, 11(6), 064005.
- Harries-Rees, K. (2002). Recent Developments in the Western European Coatings Market (in Chinese). *China Chemicals*, 7, 1.
- He, K. (2015). Technical Manual for Compilation of Urban Air Pollutant Emission Inventories (in Chinese).
- Hersbach, H., Bell, B., Berrisford, P., Hirahara, S., Horányi, A., Muñoz-Sabater, J., ... & Thépaut, J. N. (2020). The ERA5 global reanalysis. *Quarterly Journal of the Royal Meteorological Society*, 146(730), 1999-2049.
- History database of the Global Environment (HYDE). <https://landuse.sites.uu.nl/datasets/>
- ICI Paints. (1989). The world paints market towards 2000. *Pigment and Resin Technology*, 18(11), 7-12.
- Information Research List (IRL). (2012). A Profile of the Russian Paint Industry. <https://www.pcimag.com/articles/96923-a-profile-of-the-russian-paint-industry>
- Information Research List (IRL). (2015). Profile of the African paint industry. <https://www.european-coatings.com/news/raw-materials/profile-of-the-african-paint-industry/>
- International Energy Agency (IEA). (2022). World Energy, Oil, and Natural Gas Statistics. <https://www.iea.org/data-and-statistics>
- International Finishing and Surface Coating (IFSC). (1972). International Finishing Industries Manual 1972.
- KAISAI Paint. (2019). Integrated Report. <https://www.kansai.com/ir/library/integrated-report/>

- KDM International Ltd. (2019). Russian Coating Market. <https://www.kdm-international.com/wp-content/uploads/2021/03/Market-Information.pdf>
- Keita, S., Liousse, C., Assamoi, E. M., Doumbia, T., Touré, N. D. E., Gnamien, S., ... & Yoboué, V. (2021). African anthropogenic emissions inventory for gases and particles from 1990 to 2015. *Earth System Science Data*, 13, 3691-3705.
- Klimont, Z., Streets, D. G., Gupta, S., Cofala, J., Lixin, F., & Ichikawa, Y. (2002). Anthropogenic emissions of non-methane volatile organic compounds in China. *Atmospheric Environment*, 36(8), 1309-1322.
- Klimont, Z., Streets, D. G., Gupta, S., Cofala, J., Lixin, F., & Ichikawa, Y. (2002). Anthropogenic emissions of non-methane volatile organic compounds in China. *Atmospheric Environment*, 36(8), 1309-1322.
- Kougoulis, J.S., Kaps, R., Walsh, B., Bojczuk, K., & Crchton, T. (2012). Revision of EU European Ecolabel and Development of EU Green Public Procurement Criteria for Indoor and Outdoor Paints and Varnishes-Ecolabel Background Report. [https://susproc.jrc.ec.europa.eu/product-bureau/sites/default/files/contenttype/product\\_group\\_documents/1581689805/Preliminary%20report.pdf](https://susproc.jrc.ec.europa.eu/product-bureau/sites/default/files/contenttype/product_group_documents/1581689805/Preliminary%20report.pdf)
- Li, M., Liu, H., Geng, G., Hong, C., Liu, F., Song, Y., ... & He, K. (2017). Anthropogenic emission inventories in China: a review. *National Science Review*, 4(6), 834-866.
- Li, M., Zhang, Q., Zheng, B., Tong, D., Lei, Y., Liu, F., ... & He, K. (2019). Persistent growth of anthropogenic non-methane volatile organic compound (NMVOC) emissions in China during 1990–2017: drivers, speciation and ozone formation potential. *Atmospheric Chemistry and Physics*, 19(13), 8897-8913.
- Li, X., Gong, P., Zhou, Y., Wang, J., Bai, Y., Chen, B., ... & Zhu, Z. (2020). Mapping global urban boundaries from the global artificial impervious area (GAIA) data. *Environmental Research Letters*, 15(9), 094044.
- Liu, C. (2018). Progress of the world's plastics industry in 2016-2017 (I) (in Chinese). *China Plastics Industry*, 46(3), 1-12.
- Liu, F., Zhang, Q., Tong, D., Zheng, B., Li, M., Huo, H., & He, K. B. (2015). High-resolution inventory of technologies, activities, and emissions of coal-fired power plants in China from 1990 to 2010. *Atmospheric Chemistry and Physics*, 15(23), 13299-13317.
- Liu, H., Fu, M., Jin, X., Shang, Y., Shindell, D., Faluvegi, G., ... & He, K. (2016). Health and climate impacts of ocean-going vessels in East Asia. *Nature climate change*, 6(11), 1037-1041.
- Liu, H., Gong, P., Wang, J., Clinton, N., Bai, Y., & Liang, S. (2020). Annual dynamics of global land cover and its long-term changes from 1982 to 2015. *Earth System Science Data*, 12(2), 1217-1243.
- Liu, J., Tong, D., Zheng, Y., Cheng, J., Qin, X., Shi, Q., ... & Zhang, Q. (2021). Carbon and air pollutant emissions from China's cement industry 1990–2015: trends, evolution of technologies and drivers. *Atmospheric Chemistry and Physics*, 21, 1627-1647.
- Liu, S. (2007). China's Footwear Industry: Producing Half of the World's Shoes (in Chinese), World

- Rubber Industry, 34(1), 40-41.
- Liu, X. (1984). Development of New Varieties, Production of Active Pharmaceutical Ingredients, and Market Competition in the United States, Japan, and the United Kingdom (in Chinese). Foreign Pharmacy (Antibiotics Volume).
- Lu, Z., Zhang, Q., & Streets, D. G. (2011). Sulfur dioxide and primary carbonaceous aerosol emissions in China and India, 1996–2010. *Atmospheric Chemistry and Physics*, 11(18), 9839-9864.
- Luo, Z., Lv, Z., Zhao, J., Sun, H., He, T., Yi, W., ... & Liu, H. (2024). Shipping-related pollution decreased but mortality increased in Chinese port cities. *Nature Cities*, 1(4), 295-304.
- Menukhin, O. (2018). An Overview of the Global Automotive Coatings Market (in Chinese). *China Coatings*, 33(02), 74-76.
- Menukhin, O. (2020). Global Waterborne Coatings Market Grows Steadily (in Chinese). *China Coatings*, 35(01), 75-76.
- Mordor Intelligence. (2021). India Automotive Paints and Coatings Market – Growth, Trends, COVID-19 Impacts, and Forecasts (2022-2027). <https://www.mordorintelligence.com/industry-reports/india-automotive-paints-and-coatings-market>
- Morikis, J. (2019). Industry Overview (Sherwin-Williams). [https://s2.q4cdn.com/918177852/files/doc\\_presentations/FCP19-All-Presentations.pdf](https://s2.q4cdn.com/918177852/files/doc_presentations/FCP19-All-Presentations.pdf)
- OAG. <https://www.oag.com/>
- OpenStreetMap. <https://www.openstreetmap.org/>
- Oullette, J. (2004). Global Automotive Coatings Market Trends (in Chinese). *China Chemicals*, 3, 26.
- Pearson, J. K. (2019). European solvent VOC emission inventories based on industry-wide information. *Atmospheric Environment*, 204, 118-124.
- Pollard, D. (2018). Architectural Coatings – Colourful Outlook. <https://pra-world.com/news/irfab-article-architectural-coatings-colourful-outlook/>
- Punmiya, V. (2020). Paint Sector. [https://images.assettype.com/bloombergquint/2020-09/162fc669-fb6f-4001-ae74-26c54252da3d/Nirmal\\_Bang\\_Paint\\_Sector\\_Update\\_010920.pdf](https://images.assettype.com/bloombergquint/2020-09/162fc669-fb6f-4001-ae74-26c54252da3d/Nirmal_Bang_Paint_Sector_Update_010920.pdf)
- Qin, X., Tong, D., Liu, F., Wu, R., Zheng, B., Zheng, Y., ... & Zhang, Q. (2022). Global and regional drivers of power plant CO<sub>2</sub> emissions over the last three decades revealed from unit-based database. *Earth's Future*, 10(10), e2022EF002657.
- Qu, Y. (2000). Coating industry development in the 21st century (in Chinese). *Chemical Technology and Economics*, 018(005), 1-5.
- Rácz, F.Z. & Yamaga, W.T. (2017). Coatings market South America: Back to the stage. <https://www.european-coatings.com/news/raw-materials/coatings-market-south-america-back-to-the-stage/>
- Rijksinstituut voor Volksgezondheid en Milieu. (2022). Emission registration Netherland.

- <http://www.emissieregistratie.nl/>
- Shi, Z. (1984). A Survey of the Domestic and International Plastics Industry (in Chinese). Qilu Petrochemical, 1, 42-44.
- Sun, C. (1998). Overview of the Development of the Coatings Industry in Japan (I) (in Chinese). Modern Paint & Finishing, 3, 26-28.
- Sun, C. (1999). Overview of the Development of the Coatings Industry in Japan (II) (in Chinese). Modern Paint & Finishing, 1, 34-36.
- Timetric. (2011). Global Construction Paints and Coatings – Market Opportunities and Business Environment, Analyses and Forecasts to 2016-Global Sector Report. <https://construction.globaldata.com/uploads/report/1184/b88188cb-0a34-445e-a81f-e5d8a21309b2.pdf>
- Tong, D., Zhang, Q., Davis, S. J., Liu, F., Zheng, B., Geng, G., ... & He, K. (2018). Targeted emission reductions from global super-polluting power plant units. Nature Sustainability, 1(1), 59-68.
- United Nation Statistics Division (UNSD). (2022a). UNdata. <https://data.un.org/Default.aspx>
- United Nation Statistics Division (UNSD). (2022b). UN Statistical Yearbooks 1970-2021. <https://unstats.un.org/UNSDWebsite/Publications/StatisticalYearbook/>
- United Nation Statistics Division (UNSD). (2022c). UN Comtrade Database. <https://comtradeplus.un.org/>
- United Nations (UN), Department of Economic and Social Affairs, Population Division. (2021). World Population Prospects 2021. <https://population.un.org/wpp/Download/Standard/Population/>
- United Nations Framework Convention on Climate Change (UNFCCC). (2022). National Inventory Submissions. [https://di.unfccc.int/flex\\_annex1](https://di.unfccc.int/flex_annex1)
- United States Geological Survey (USGS). (2022). Nitrogen Statistics and Information. <https://www.usgs.gov/centers/national-minerals-information-center/nitrogen-statistics-and-information>
- US Environmental Protection Agency (EPA). (2001). Procedures document for national emission inventory criteria air pollutants 1985-1999. [https://www.epa.gov/sites/default/files/2015-07/documents/aerr\\_final\\_rule.pdf](https://www.epa.gov/sites/default/files/2015-07/documents/aerr_final_rule.pdf)
- US Environmental Protection Agency (EPA). (2001). Uncontrolled Emission Factor Listing for Criteria Air Pollutants. [https://www.epa.gov/sites/default/files/2015-08/documents/ii14\\_july2001.pdf](https://www.epa.gov/sites/default/files/2015-08/documents/ii14_july2001.pdf)
- US Environmental Protection Agency (EPA). (2007). Leak Detection and Repair: A Best Practices Guide. <https://www.epa.gov/compliance/leak-detection-and-repair-best-practices-guide>
- US Environmental Protection Agency (EPA). (2021). Exhaust and crankcase emission factors for nonroad compression-ignition engines in MOVES3.0.2. <https://nepis.epa.gov/Exe/ZyPDF.cgi?Dockkey=P1013KWQ.pdf>
- van Broekhuizen, J.C., Terwoert, J., Le Feber, M., Thornton, P.J., Colreavy, J., Mulvihill, J.,

- McStravick, I., Black, D., Murphy, J., McAuliffe, H., van der Veen, M. & Walhain, S. (2000). EC DG Environment Tender E1/ETU/980084-Final Report. <https://www.certifico.com/component/attachments/download/3429>
- Von Dungen, M., & Maier, C. (2015). The Global Paints and Coatings Market 2014-2015: India and China are boosting the global demand (in Chinese). *China Coatings*, 30(009):74.
- Wang, G. (1989). Current Status and Development of the Coatings Industry Domestically and Internationally (in Chinese). *Paint Industry*, 4, 42-51.
- Wang, X. T., Liu, H., Lv, Z. F., Deng, F. Y., Xu, H. L., Qi, L. J., ... & He, K. B. (2021). Trade-linked shipping CO<sub>2</sub> emissions. *Nature Climate Change*, 11(11), 945-951.
- Wei, W., Wang, S., Chatani, S., Klimont, Z., Cofala, J., & Hao, J. (2008). Emission and speciation of non-methane volatile organic compounds from anthropogenic sources in China, *Atmospheric Environment*, 42, 4976-4988.
- Woodex. (2020). Russian Coating Market. <https://woodexpo.ru/en/>
- World Bank. (2022). World Bank Country and Lending Groups. <https://datahelpdesk.worldbank.org/knowledgebase/articles/906519-world-bank-country-and-lending-groups>
- World Steel Association. (2021). Steel Statistical Yearbooks 1978-2020. <https://worldsteel.org/publications/bookshop/>
- WorldPop. <https://www.worldpop.org/>
- Xu, R., Tong, D., Davis, S. J., Qin, X., Cheng, J., Shi, Q., ... & Zhang, Q. (2023). Plant-by-plant decarbonization strategies for the global steel industry. *Nature Climate Change*, 13(10), 1067-1074.
- Xu, R., Tong, D., Davis, S. J., Qin, X., Cheng, J., Shi, Q., ... & Zhang, Q. (2023). Plant-by-plant decarbonization strategies for the global steel industry. *Nature Climate Change*, 13(10), 1067-1074.
- Xu, W. (2002). An Overview of the Russian Coatings Market (in Chinese). *Fine and Specialty Chemicals*, 10(24), 10-12.
- Yan, L., Zhang, Q., He, K., & Zheng, B. (2024). Modeling fuel-, vehicle type-, and age-specific CO<sub>2</sub> emissions from global on-road vehicles, 1970–2020. *Earth System Science Data Discussion*.
- Yang, C. (2004). Recovery of the Paint and Coatings Industry in Brazil (in Chinese).
- Zhang, Q., Streets, D. G., Carmichael, G. R., He, K. B., Huo, H., Kannari, A., ... & Yao, Z. L. (2009). Asian emissions in 2006 for the NASA INTEX-B mission. *Atmospheric Chemistry and Physics*, 9(14), 5131-5153.
- Zhao, J. (1998). The current development characteristics and trends of coatings at home and abroad (in Chinese). *China Coatings*, 1, 41-46.
- Zhao, Y., Nielsen, C. P., Lei, Y., McElroy, M. B., & Hao, J. (2011). Quantifying the uncertainties of a bottom-up emission inventory of anthropogenic atmospheric pollutants in China. *Atmospheric Chemistry and Physics*, 11(5), 2295-2308.



- Zheng Y. (1996). Overview of the Ink Industry in Various Countries (in Chinese). *Printing Field*, 1, 56-59.
- Zheng, B., Huo, H., Zhang, Q., Yao, Z. L., Wang, X. T., Yang, X. F., ... & He, K. B. (2014). High-resolution mapping of vehicle emissions in China in 2008. *Atmospheric Chemistry and Physics*, 14(18), 9787-9805.
- Zhiyan Consulting. (2017). Development Status and Trend Prediction of China's Waterborne Coatings Industry in 2017 (in Chinese). <https://www.chyxx.com/industry/201709/565825.html>
- Zhong, X., (2019). Progress of the world's plastics industry in 2017-2018 (I) (in Chinese). *China Plastics Industry*, 47(3), 1-7.
- Zhou, F. (1997). Recent Overview of the Global Coatings Industry (in Chinese). *China Coatings*, 5, 46-48.
- Zhou, F. (1998). Current Status of the Coatings Industry in India. *China Coatings* (in Chinese). *China Coatings*, 6, 35-37.
- Zhou, F. (2000). Global Coatings Market Outlook (in Chinese). *China Paint*, 4, 38-39.
- Zhu, C. (1982). Overview of the Coatings Industry in Brazil (in Chinese). *Paint & Coatings Industry*, 12(1), 37-38.
- Zhuang, H. (1996). Overview of Global Raw Silk Production and Silk Products Market (in Chinese). *Silk*, 4, 63.
